# Supplementary material for: Design, synthesis and mechanistic insights into triclosan derived dimers as potential anti-plasmodials
Source: Royal Society of Chemistry journal article supplement (doi:10.1039/d4md00494a), 2024-10-11

## Design, Synthesis and Mechanistic insights of Triclosan Derived Dimers as potential anti-plasmodials

Shekhar<sup>1</sup>, Shefali Chowdhary<sup>1</sup>, Joel Mosnier<sup>2,3,4,5</sup>, Isabelle Fonta<sup>2,3,4,5</sup>, Bruno Pradines<sup>2,3,4,5</sup>, Vipin Kumar<sup>1\*</sup>

<sup>1</sup> Department of Chemistry, Guru Nanak Dev University, Amritsar 143005, Punjab, India

<sup>2</sup> Department of Chemistry, Khalsa College, Amritsar 143005, Punjab, India.

<sup>3</sup> Unité Parasitologie et Entomologie, Département Microbiologie et Maladies Infectieuses, Institut de Recherche Biomédicale des Armées, Marseille 13005, France.

<sup>4</sup> Aix Marseille Univ, SSA, AP-HM, RITMES, Marseille 13005, France.

<sup>5</sup> IHU Méditerranée Infection, Marseille 13005, France.

<sup>6</sup> Centre National de Référence du Paludisme, Marseille 13005, France.

### Contents

|                                                                                               |       |
|-----------------------------------------------------------------------------------------------|-------|
| Physicochemical and ADMET properties of compound.                                             | 1-5   |
| Binding studies with monomeric Heme                                                           | 5-6   |
| Spectral data of synthesized compounds.                                                       | 6-13  |
| Scanned copies of <sup>1</sup> H and <sup>13</sup> C-NMR spectra of representative compounds. | 14-31 |

**Table S1:** Physicochemical and ADMET properties of compound.

|                                                        | <b>3a</b>  | <b>3b</b>  | <b>3c</b>  | <b>3d</b>  | <b>3e</b>  | <b>10a</b> | <b>10b</b> | <b>10c</b> | <b>10d</b> | <b>10e</b> |
|--------------------------------------------------------|------------|------------|------------|------------|------------|------------|------------|------------|------------|------------|
| <b>Absorption</b>                                      |            |            |            |            |            |            |            |            |            |            |
| Water solubility (log mol/L)                           | -5.278     | -6.348     | -4.165     | -4.909     | -3.967     | -3.194     | -3.171     | -3.158     | -3.131     | -3.109     |
| Caco2 permeability (log Papp in 10 <sup>-6</sup> cm/s) | 1.079      | 1.058      | 1.081      | 1.057      | 1.093      | 1.097      | 1.022      | 0.991      | 1.01       | 1.019      |
| Intestinal absorption (human) (% Absorbed)             | 86.69<br>3 | 85.51<br>1 | 87.56<br>2 | 86.52<br>5 | 85.95<br>6 | 89.623     | 90.06      | 89.235     | 88.282     | 87.71      |
| Skin permeability (log Kp)                             | -2.735     | -2.735     | -2.735     | -2.735     | -2.735     | -2.735     | -2.735     | -2.735     | -2.735     | -2.735     |
| P-glycoprotein substrate                               | No         |
| P-glycoprotein I inhibitor                             | Yes        |

|                                         |        |        |        |        |        |        |        |        |        |        |
|-----------------------------------------|--------|--------|--------|--------|--------|--------|--------|--------|--------|--------|
| P-glycoprotein II inhibitor             | Yes    |
| <b>Metabolism</b>                       |        |        |        |        |        |        |        |        |        |        |
| CYP2D6 substrate                        | No     |
| CYP3A4 substrate                        | Yes    |
| CYP1A2 inhibitor                        | No     |
| CYP2C19 Inhibitor                       | Yes    | Yes    | No     | No     | No     | Yes    | Yes    | Yes    | Yes    | Yes    |
| CYP2C9 inhibitor                        | Yes    |
| CYP2D6 inhibitor                        | No     |
| CYP3A4 inhibitor                        | Yes    |
| <b>Excretion</b>                        |        |        |        |        |        |        |        |        |        |        |
| Total Clearance (log ml/min/kg)         | -0.081 | 0.111  | 0.015  | -0.017 | -0.047 | 0.049  | 0.071  | -0.022 | -0.05  | -0.019 |
| Renal OCT2 substrate                    | No     |
| <b>Distribution</b>                     |        |        |        |        |        |        |        |        |        |        |
| VDss (human) (log L/kg)                 | -0.574 | -0.392 | -0.752 | -0.68  | -0.839 | -0.742 | -0.756 | 0.791  | -0.84  | -0.875 |
| BBB permeability (log BB)               | -0.078 | -0.15  | -0.185 | -0.232 | -0.125 | -2.182 | -2.221 | -2.254 | -2.272 | -2.287 |
| Fraction unbound (human) (Fu)           | 0.275  | 0.21   | 0.343  | 0.318  | 0.361  | 0.403  | 0.415  | 0.428  | 0.436  | 0.443  |
| CNS permeability (log PS)               | -1.069 | -1.002 | -1.15  | -1.141 | -1.128 | -2.77  | -2.744 | -2.71  | -2.653 | -2.59  |
| <b>Toxicity</b>                         |        |        |        |        |        |        |        |        |        |        |
| Oral Rat Acute Toxicity (LD50) (mol/kg) | 2.652  | 2.614  | 2.663  | 2.608  | 2.494  | 2.602  | 2.668  | 2.69   | 2.673  | 2.628  |

|                                         |        |        |        |        |        |         |         |         |         |        |
|-----------------------------------------|--------|--------|--------|--------|--------|---------|---------|---------|---------|--------|
| Hepatotoxicity                          | No     | No     | No     | No     | No     | No      | No      | No      | No      | No     |
| Skin Sensitisation                      | No     | No     | No     | No     | No     | No      | No      | No      | No      | No     |
| <i>T.Pyriformis</i> toxicity (log ug/L) | 0.285  | 0.285  | 0.285  | 0.285  | 0.285  | 0.285   | 0.285   | 0.285   | 0.285   | 0.285  |
| Minnow toxicity (log mM)                | -7.202 | -7.518 | -8.076 | -7.539 | -7.275 | -10.373 | -10.316 | -10.478 | -10.112 | -9.348 |
| <b>LogP</b>                             | 8.57   | 9.04   | 9.34   | 9.69   | 9.94   | 10.44   | 10.83   | 11.22   | 11.61   | 12.00  |
| <b>TPSA (Å)</b>                         | 36.92  | 36.92  | 36.92  | 36.92  | 36.92  | 67.63   | 67.63   | 67.63   | 67.63   | 67.63  |
| <b>No. of HBA</b>                       | 4      | 4      | 4      | 4      | 4      | 6       | 6       | 6       | 6       | 6      |
| <b>No. of HBD</b>                       | 0      | 0      | 0      | 0      | 0      | 0       | 0       | 0       | 0       | 0      |
| <b>Molar refractivity</b>               | 146.85 | 151.65 | 156.46 | 161.27 | 166.07 | 166.17  | 170.98  | 175.79  | 180.60  | 185.40 |

|                                                        | 11a    | 11b    | 11c    | 11d    | 11e    | 12a    | 12b    | 12c    | 12d    | 12e    |
|--------------------------------------------------------|--------|--------|--------|--------|--------|--------|--------|--------|--------|--------|
| <b>Absorption</b>                                      |        |        |        |        |        |        |        |        |        |        |
| Water solubility (log mol/L)                           | -3.037 | -3.019 | -3.007 | -2.991 | -2.978 | -4.434 | -4.461 | -4.422 | -4.343 | -4.242 |
| Caco2 permeability (log Papp in 10 <sup>-6</sup> cm/s) | 0.498  | 0.463  | 0.462  | 0.476  | 0.476  | 0.788  | 0.755  | 0.726  | 0.702  | 0.691  |
| Intestinal absorption (human) (% Absorbed)             | 100    | 100    | 100    | 100    | 100    | 83.194 | 83.031 | 82.792 | 81.769 | 81.06  |
| Skin permeability (log Kp)                             | -2.735 | -2.735 | -2.735 | -2.735 | -2.735 | -2.735 | -2.735 | -2.725 | -2.735 | -2.735 |
| P-glycoprotein substrate                               | No     | No     | No     | No     | No     | Yes    | Yes    | Yes    | Yes    | Yes    |
| P-glycoprotein I inhibitor                             | Yes    |
| P-glycoprotein II inhibitor                            | Yes    |

| <b>Metabolism</b>                   |        |        |        |        |        |        |        |        |        |        |
|-------------------------------------|--------|--------|--------|--------|--------|--------|--------|--------|--------|--------|
| CYP2D6 substrate                    | No     |
| CYP3A4 substrate                    | Yes    |
| CYP1A2 inhibitor                    | No     |
| CYP2C19 Inhibitor                   | Yes    |
| CYP2C9 inhibitor                    | Yes    |
| CYP2D6 inhibitor                    | No     |
| CYP3A4 inhibitor                    | Yes    |
| <b>Excretion</b>                    |        |        |        |        |        |        |        |        |        |        |
| Total Clearance (log ml/min/kg)     | 0.279  | 0.301  | 0.208  | 0.18   | 0.211  | 0.367  | 0.381  | 0.288  | 0.26   | 0.291  |
| Renal OCT2 substrate                | No     |
| <b>Distribution</b>                 |        |        |        |        |        |        |        |        |        |        |
| VD <sub>ss</sub> (human) (log L/kg) | -1.118 | -1.135 | -1.167 | -1.196 | -1.217 | -0.652 | -0.662 | -0.67  | -0.71  | -0.759 |
| BBB permeability (log BB)           | -2.694 | -2.733 | -2.765 | -2.783 | -2.685 | -2.24  | -2.237 | 0.333  | -2.266 | -2.282 |
| Fraction unbound (human) (Fu)       | 0.453  | 0.465  | 0.475  | 0.48   | 0.484  | 0.323  | 0.326  | -2.242 | 0.344  | 0.352  |
| CNS permeability (log PS)           | -2.801 | -2.816 | -2.803 | -2.748 | -2.685 | -2.636 | -2.616 | -2.601 | -2.567 | -2.558 |
| <b>Toxicity</b>                     |        |        |        |        |        |        |        |        |        |        |
| Oral Rat Acute Toxicity             | 2.434  | 2.452  | 2.462  | 2.462  | 2.457  | 2.904  | 2.826  | 2.745  | 2.674  | 2.622  |

|                                         |        |         |         |        |         |        |        |        |        |        |
|-----------------------------------------|--------|---------|---------|--------|---------|--------|--------|--------|--------|--------|
| (LD50)<br>(mol/kg)                      |        |         |         |        |         |        |        |        |        |        |
| Hepatotoxicity                          | No     | No      | No      | No     | No      | No     | No     | No     | No     | No     |
| Skin Sensitisation                      | No     | No      | No      | No     | No      | No     | No     | No     | No     | No     |
| <i>T.Pyriformis</i> toxicity (log ug/L) | 0.285  | 0.285   | 0.285   | 0.285  | 0.285   | 0.285  | 0.285  | 0.285  | 0.285  | 0.285  |
| Minnow toxicity (log mM)                | -11.9  | -11.704 | -11.748 | -11.15 | -10.118 | -1.75  | -2.929 | -3.665 | -4.135 | -4.282 |
| Log <i>P</i>                            | 10.34  | 10.73   | 11.12   | 11.51  | 11.90   | 10.17  | 10.56  | 10.96  | 11.35  | 11.74  |
| TPSA (Å)                                | 113.45 | 113.45  | 113.45  | 113.45 | 113.45  | 90.66  | 90.66  | 90.66  | 90.66  | 90.66  |
| No. of HBA                              | 8      | 8       | 8       | 8      | 8       | 6      | 6      | 6      | 6      | 6      |
| No. of HBD                              | 0      | 0       | 0       | 0      | 0       | 2      | 2      | 2      | 2      | 2      |
| Molar refractivity                      | 175.45 | 179.80  | 184.61  | 189.42 | 194.45  | 171.01 | 175.82 | 180.63 | 185.43 | 190.24 |

| Toxicity                                | Chloroquine (CQ) | Amodiaquine (AQ) | Quinine (QN) |
|-----------------------------------------|------------------|------------------|--------------|
| Oral Rat Acute Toxicity (LD50) (mol/kg) | 3.011            | 3.055            | 2.69         |

### Binding studies with monomeric Heme.

The stock solution (1.2 mM) of hemin chloride was prepared by dissolving hemin chloride (7.8 mg) in DMSO (10 mL). Working solution (12 μM) of hemin chloride was prepared by diluting hemin stock solution (100 μL) to 1 mL 0.02M HEPES buffer (pH 7.4), 4mL DMSO and making final volume up to 10 mL with ultrapure, HPLC grade Hipersolv water. The resultant 40% DMSO solutions maintain the hemin solutions in monomeric state at concentrations used. Likewise, the stock solution (10 mM) of **3a**, **12b** and **TCS** was prepared in DMSO. Working solution (100 μM) of **3a**, **12b** and **TCS** was prepared by diluting (100 μL) to 1mL 0.02M HEPES buffer (pH 7.4), 4mL DMSO and making final volume up to 10 mL. All the working solutions were kept in dark to avoid photo-sensitivity. Diluent solutions were prepared by dissolving 1 mL of 0.02 M HEPES and 4 mL of spectroscopic grade DMSO and made up to a

final volume of 10 mL with ultrapure, HPLC grade Hipersolv water. Hemin chloride solution (12  $\mu\text{M}$ , 2.5 mL) was titrated with increasing concentrations of **3a**, **12b** and TCS. Subsequent to each addition of aliquot of the compound in the solution of hemin chloride, absorbance was recorded at 401 nm. Likewise, solution of hemin chloride and **3a**, **12b** and TCS were titrated at pH 5.6 (2-[N-morpholino] ethanesulphonate (MES, pH 5.4) buffer was used).

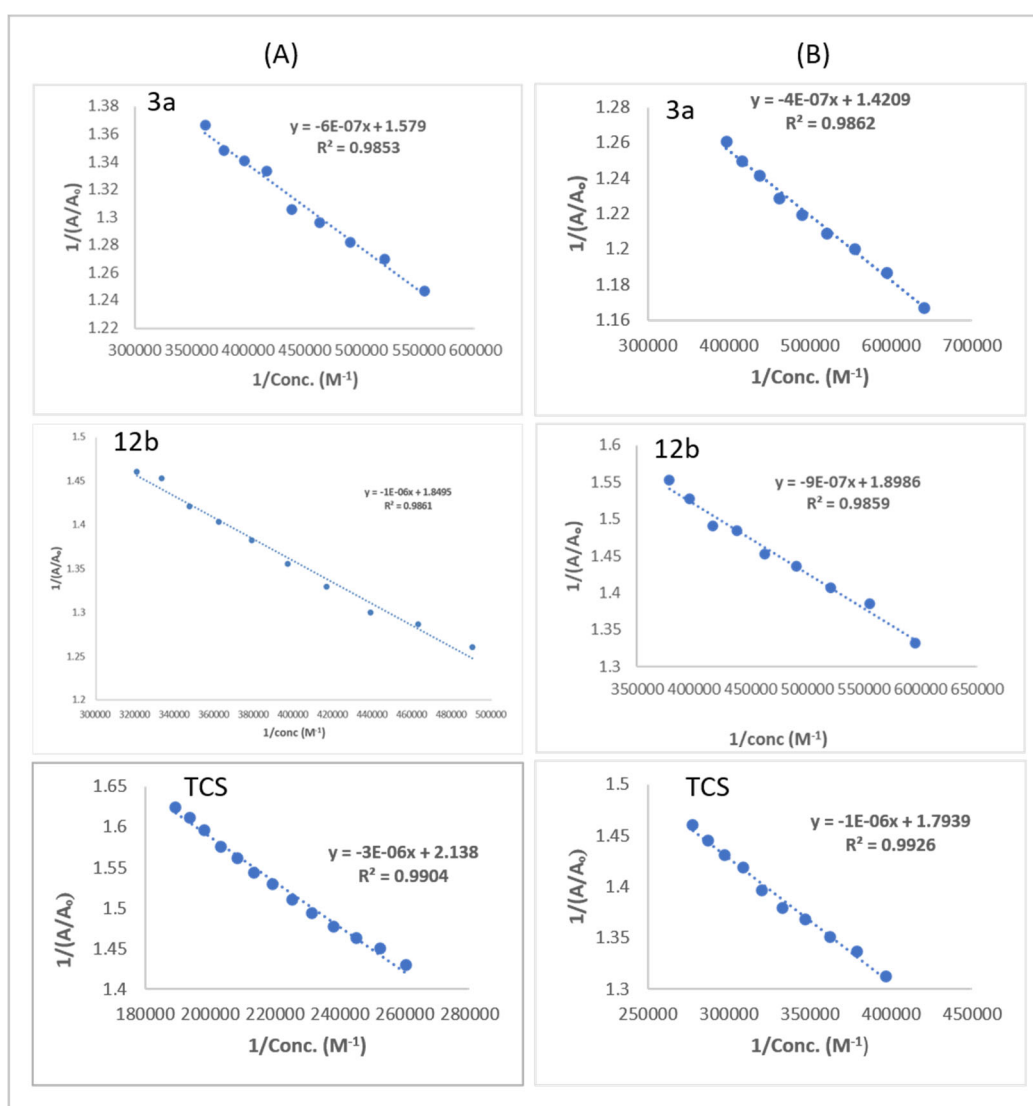

Titration of monomeric heme (12  $\mu\text{M}$ ) with increasing concentration of compound **3a**, **12b** and TCS along with linear dependence of absorption at 401 nm on heme–**3a**, **12b** and TCS complex concentration in aqueous DMSO solution at (A) pH 7.4, 0.02 M HEPES buffer and (B) pH 5.6, 0.02 M MES buffer, respectively.

## Spectral data of synthesized compounds.

### *1,2-bis(5-chloro-2-(2,4-dichlorophenoxy)phenoxy)ethane (3a)*

Brown oil (yield 68%);  $^1\text{H}$  NMR (400 MHz,  $\text{CDCl}_3$ )  $\delta$  7.37 (d,  $J = 2.4$  Hz, 2H, Ar-H), 7.04 (dd,  $J = 8.8, 2.5$  Hz, 2H, Ar-H), 6.94 (d,  $J = 2.0$  Hz, 2H, Ar-H), 6.93 (d,  $J = 2.4$  Hz, 1H, Ar-H), 6.91 (d,  $J = 2.4$  Hz, 1H, Ar-H), 6.86 (s, 1H, Ar-H), 6.84 (s, 1H, Ar-H), 6.66 (s, 1H, Ar-H), 6.64 (s, 1H, Ar-H), 4.17 (s, 4H,  $\text{CH}_2$ ).  $^{13}\text{C}$  NMR (100 MHz,  $\text{CDCl}_3$ )  $\delta$  152.10, 150.38, 143.86, 130.35, 130.28, 128.34, 127.79, 124.90, 122.08, 121.64, 118.74, 116.06, 68.12.  $\text{C}_{26}\text{H}_{16}\text{Cl}_6\text{O}_4$   $[\text{M}]^+$  601.9180,  $[\text{M}+2]^+$  603.9150,  $[\text{M}+4]^+$  605.9121, and  $[\text{M}+6]^+$  607.9091 and found 601.9192, 603.9161, 605.9110 and 607.9079.

### *1,3-bis(5-chloro-2-(2,4-dichlorophenoxy)phenoxy)propane (3b)*

Light yellow oil (yield 70%);  $^1\text{H}$  NMR (400 MHz,  $\text{CDCl}_3$ )  $\delta$  7.40 (d,  $J = 2.5$  Hz, 2H, Ar-H), 6.97 – 6.92 (m, 6H, Ar-H), 6.85 (d,  $J = 2.1$  Hz, 2H, Ar-H), 6.53 (d,  $J = 8.8$  Hz, 2H, Ar-H), 3.80 (t,  $J = 5.8$  Hz, 4H,  $\text{CH}_2$ ), 1.95-1.89 (m, 2H,  $\text{CH}_2$ ).  $^{13}\text{C}$  NMR (100 MHz,  $\text{CDCl}_3$ )  $\delta$  152.61, 150.69, 142.70, 130.99, 130.18, 127.82, 127.57, 124.12, 122.43, 121.34, 117.45, 114.75, 64.59, 28.79.  $\text{C}_{27}\text{H}_{18}\text{Cl}_6\text{O}_4$   $[\text{M}]^+$  615.9336,  $[\text{M}+2]^+$  617.9307,  $[\text{M}+4]^+$  619.9277, and  $[\text{M}+6]^+$  621.9248 and found 615.9347, 617.9320, 619.9265 and 621.9236.

### *1,4-bis(5-chloro-2-(2,4-dichlorophenoxy)phenoxy)butane (3c)*

Light yellow oil (yield 71%);  $^1\text{H}$  NMR (400 MHz,  $\text{CDCl}_3$ )  $\delta$  7.42 (d,  $J = 2.5$  Hz, 1H, Ar-H), 7.08 (d,  $J = 2.5$  Hz, 1H, Ar-H), 7.06 (d,  $J = 2.5$  Hz, 1H, Ar-H), 7.00 – 6.86 (m, 7H, Ar-H), 6.61 (d,  $J = 8.8$  Hz, 2H, Ar-H), 3.93 (t,  $J = 5.6$  Hz, 4H,  $\text{CH}_2\text{-CH}_2$ ), 3.31 (t,  $J = 6.3$  Hz, 4H,  $\text{CH}_2\text{-CH}_2$ ). NMR (101 MHz,  $\text{CDCl}_3$ )  $\delta$  152.66, 150.82, 142.95, 130.79, 130.29, 127.89, 127.65, 124.32, 122.44, 121.26, 117.65, 114.79, 68.05, 29.05.  $\text{C}_{28}\text{H}_{20}\text{Cl}_6\text{O}_4$   $[\text{M}]^+$  629.9493,  $[\text{M}+2]^+$  631.9463,  $[\text{M}+4]^+$  633.9434, and  $[\text{M}+6]^+$  635.9404 and found 629.9482, 631.9474, 633.9423 and 635.9416.

### *1,5-bis(5-chloro-2-(2,4-dichlorophenoxy)phenoxy)pentane (3d)*

Light yellow oil (yield 69%);  $^1\text{H}$  NMR (400 MHz,  $\text{CDCl}_3$ )  $\delta$  7.39 (d,  $J = 2.5$  Hz, 2H, Ar-H), 7.05 (d,  $J = 2.5$  Hz, 1H, Ar-H), 7.03 (d,  $J = 2.5$  Hz, 1H, Ar-H), 6.96 (d,  $J = 8.4$  Hz, 2H, Ar-H), 6.92 (dt,  $J = 8.3, 2.2$  Hz, 4H, Ar-H), 6.59 (d,  $J = 8.8$  Hz, 2H, Ar-H), 3.80 (t,  $J = 6.2$  Hz, 4H,  $\text{CH}_2\text{-CH}_2$ ), 1.57–1.49 (m, 6H,  $\text{CH}_2\text{-CH}_2$ ).  $^{13}\text{C}$  NMR (126 MHz,  $\text{CDCl}_3$ )  $\delta$  152.70, 150.96, 142.78, 130.77, 130.04, 127.60, 127.52, 124.24, 122.33, 120.94, 117.63, 114.65, 68.76, 28.42,

22.20. C<sub>29</sub>H<sub>22</sub>Cl<sub>6</sub>O<sub>4</sub> [M]<sup>+</sup> 643.9649, [M+2]<sup>+</sup> 645.9620, [M+4]<sup>+</sup> 647.9590, and [M+6]<sup>+</sup> 649.9561 and found 643.9660, 645.9632, 647.9579 and 649.9572.

*1,6-bis(5-chloro-2-(2,4-dichlorophenoxy)phenoxy)hexane (3e)*

Light yellow oil (yield 75%); <sup>1</sup>H NMR (500 MHz, CDCl<sub>3</sub>) δ 7.35 (d, *J* = 1.4 Hz, 2H, Ar-H), 7.17 (dd, *J* = 7.5, 1.4 Hz, 2H, Ar-H), 6.94 (s, 1H, Ar-H), 6.93 (s, 3H, Ar-H), 6.90 (dd, *J* = 7.5, 1.4 Hz, 2H, Ar-H), 6.78 (d, *J* = 7.4 Hz, 2H, Ar-H), 4.00 (t, *J* = 7.6 Hz, 4H, CH<sub>2</sub>), 1.79 (m, 4H, CH<sub>2</sub>), 1.41 – 1.38 (m, 4H, CH<sub>2</sub>). <sup>13</sup>C NMR (125 MHz, CDCl<sub>3</sub>) δ 151.75, 150.24, 148.34, 132.36, 131.16, 130.53, 129.24, 125.75, 122.89, 121.68, 121.22, 118.62, 71.44, 28.75, 25.44. C<sub>30</sub>H<sub>24</sub>Cl<sub>6</sub>O<sub>4</sub> [M]<sup>+</sup> 657.9806, [M+2]<sup>+</sup> 659.9776, [M+4]<sup>+</sup> 661.9747, and [M+6]<sup>+</sup> 663.9717 and found 657.9817, 659.9765, 661.9759 and 663.9706.

*1-(2-(5-chloro-2-(2,4-dichlorophenoxy)phenoxy)ethyl)-4-((5-chloro-2-(2,4-dichlorophenoxy)phenoxy)methyl)-1H-1,2,3-triazole (10a)*

Light yellow oil (yield 78%); <sup>1</sup>H NMR (400 MHz, CDCl<sub>3</sub>) δ 7.39 (d, *J* = 2.5 Hz, 1H, Ar-H), 7.34 (d, *J* = 2.5 Hz, 1H, Ar-H), 7.31 (s, 1H, triazole-H), 7.16 (d, *J* = 2.3 Hz, 1H, Ar-H), 7.05 (dd, *J* = 2.5, 0.6 Hz, 1H, Ar-H), 7.03 (dd, *J* = 2.5, 0.6 Hz, 1H, Ar-H), 6.97 (dd, *J* = 8.5, 2.3 Hz, 1H, Ar-H), 6.94 – 6.90 (m, 3H, Ar-H), 6.87 (t, *J* = 7.6 Hz, 1H, Ar-H), 6.64 (d, *J* = 8.8 Hz, 1H, Ar-H), 6.55 (d, *J* = 8.8 Hz, 1H, Ar-H), 5.08 (s, 2H, CH<sub>2</sub>), 4.62 (t, *J* = 4.64 Hz, 2H, CH<sub>2</sub>), 4.32 (t, *J* = 5.12 Hz, 2H, CH<sub>2</sub>). <sup>13</sup>C NMR (100 MHz, CDCl<sub>3</sub>) δ 152.17, 152.03, 150.15, 149.72, 143.64, 143.34, 143.01, 130.83, 130.48, 130.42, 130.20, 128.30, 128.16, 128.03, 127.81, 124.76, 124.32, 124.23, 122.57, 122.19, 122.02, 121.65, 118.64, 117.87, 116.14, 115.39, 67.68, 63.26, 49.67. C<sub>29</sub>H<sub>19</sub>Cl<sub>6</sub>N<sub>3</sub>O<sub>4</sub> [M]<sup>+</sup> 682.9507, [M+2]<sup>+</sup> 684.9477, [M+4]<sup>+</sup> 686.9448, and [M+6]<sup>+</sup> 688.9418 and found 682.9519, 684.9492, 686.9461 and 688.9429.

*4-((5-chloro-2-(2,4-dichlorophenoxy)phenoxy)methyl)-1-(3-(5-chloro-2-(2,4-dichlorophenoxy)phenoxy)propyl)-1H-1,2,3-triazole (10b)*

Light yellow solid (yield 82%); m.p.: 113-116 °C; <sup>1</sup>H NMR (500 MHz, CDCl<sub>3</sub>) δ 7.45 (d, *J* = 21.9 Hz, 2H, Ar-H), 7.27 (s, 1H, triazole-H), 7.16 – 7.09 (m, 3H, Ar-H), 6.99 (s, 2H, Ar-H), 6.95 (d, *J* = 11.5 Hz, 2H, Ar-H), 6.90 (d, *J* = 8.5 Hz, 1H, Ar-H), 6.72 – 6.67 (t, *J* = 6.5 Hz, 2H, Ar-H), 5.20 (s, 2H, CH<sub>2</sub>), 4.31 (t, *J* = 6.4 Hz, 2H, CH<sub>2</sub>), 3.92 (t, *J* = 5.4 Hz, 2H, CH<sub>2</sub>), 2.28 – 2.26 (m, 2H, CH<sub>2</sub>). <sup>13</sup>C NMR (125 MHz, CDCl<sub>3</sub>) δ 152.41, 152.10, 150.17, 149.88, 143.64, 143.33, 143.04, 130.77, 130.43, 130.25, 130.15, 128.23, 128.15, 127.86, 127.80, 124.68, 124.31, 123.13, 122.17, 122.06, 121.76, 121.60, 118.57, 117.97, 116.16, 115.07, 65.09, 63.59,



46.48, 29.54. C<sub>30</sub>H<sub>21</sub>Cl<sub>6</sub>N<sub>3</sub>O<sub>4</sub> [M]<sup>+</sup> 696.9663, [M+2]<sup>+</sup> 698.9634, [M+4]<sup>+</sup> 700.9604, and [M+6]<sup>+</sup> 702.9575 and found 696.9674, 698.9645, 700.9615 and 702.9563.

*1-(4-(5-chloro-2-(2,4-dichlorophenoxy)phenoxy)butyl)-4-((5-chloro-2-(2,4-dichlorophenoxy)phenoxy)methyl)-1H-1,2,3-triazole (10c)*

Beige oil (yield 81%); <sup>1</sup>H NMR (500 MHz, CDCl<sub>3</sub>) δ 7.42 (t, *J* = 2.0 Hz, 2H, Ar-H), 7.30 (s, 1H, triazole-H), 7.17 (d, *J* = 2.1 Hz, 1H, Ar-H), 7.10 (ddd, *J* = 8.6, 6.1, 2.4 Hz, 2H, Ar-H), 7.01 – 6.93 (m, 5H, Ar-H), 6.69 (d, *J* = 8.8 Hz, 1H, Ar-H), 6.68 – 6.64 (m, *J* = 8.8 Hz, 1H, Ar-H), 5.20 (s, 2H, CH<sub>2</sub>), 4.29 (t, *J* = 7.0 Hz, 2H, CH<sub>2</sub>), 3.98 (t, *J* = 5.7 Hz, 2H, CH<sub>2</sub>), 1.90 – 1.83 (m, 2H, CH<sub>2</sub>), 1.70 – 1.63 (m, 2H, CH<sub>2</sub>). <sup>13</sup>C NMR (125 MHz, CDCl<sub>3</sub>) δ 152.42, 152.23, 150.58, 150.01, 143.44, 143.41, 142.90, 130.74, 130.59, 130.18, 130.11, 128.06, 127.94, 127.78, 127.71, 124.52, 124.30, 122.50, 122.13, 122.04, 121.84, 121.39, 118.36, 117.80, 116.04, 114.79, 68.23, 63.66, 49.78, 26.89, 25.75. C<sub>31</sub>H<sub>23</sub>Cl<sub>6</sub>N<sub>3</sub>O<sub>4</sub> [M]<sup>+</sup> 710.9820, [M+2]<sup>+</sup> 712.9790, [M+4]<sup>+</sup> 714.9761, and [M+6]<sup>+</sup> 716.9731 and found 710.9809, 712.9787, 714.9771 and 716.9742.

*4-((5-chloro-2-(2,4-dichlorophenoxy)phenoxy)methyl)-1-(5-(5-chloro-2-(2,4-dichlorophenoxy)phenoxy)pentyl)-1H-1,2,3-triazole (10d)*

Brown oil (yield 78%); <sup>1</sup>H NMR (400 MHz, CDCl<sub>3</sub>) δ 7.40 (dd, *J* = 11.5, 2.5 Hz, 2H, Ar-H), 7.26 (s, 1H, triazole-H), 7.13 (d, *J* = 2.2 Hz, 1H, Ar-H), 7.09 – 7.06 (m, 2H, Ar-H), 6.97 – 6.89 (m, 5H, Ar-H), 6.65 (d, *J* = 8.8 Hz, 1H, Ar-H), 6.61 (d, *J* = 8.8 Hz, 1H, Ar-H), 5.17 (s, 2H, CH<sub>2</sub>), 4.22 (t, *J* = 7.2 Hz, 2H, CH<sub>2</sub>), 3.88 (t, *J* = 6.0 Hz, 2H, CH<sub>2</sub>), 1.81 (m, 2H, CH<sub>2</sub>), 1.65 (s, 4H, CH<sub>2</sub>). <sup>13</sup>C NMR (100 MHz, CDCl<sub>3</sub>) δ 152.70, 152.29, 150.84, 150.02, 143.46, 143.43, 142.86, 130.82, 130.67, 130.18, 130.15, 128.14, 127.87, 127.75, 127.69, 124.54, 124.32, 122.46, 122.35, 122.09, 121.92, 121.19, 118.40, 117.81, 116.00, 114.73, 68.58, 63.72, 50.27, 29.81, 28.35, 22.98. C<sub>32</sub>H<sub>25</sub>Cl<sub>6</sub>N<sub>3</sub>O<sub>4</sub> [M]<sup>+</sup> 724.9976, [M+2]<sup>+</sup> 726.9947, [M+4]<sup>+</sup> 728.9917, and [M+6]<sup>+</sup> 730.9888 and found 724.9964, 726.9958, 728.9929 and 730.9877.

*1-(6-(5-chloro-2-(2,4-dichlorophenoxy)phenoxy)hexyl)-4-((5-chloro-2-(2,4-dichlorophenoxy)phenoxy)methyl)-1H-1,2,3-triazole (10e)*

Light yellow oil (yield 84%); <sup>1</sup>H NMR (400 MHz, CDCl<sub>3</sub>) δ 7.39 (t, *J* = 2.7 Hz, 2H, Ar-H), 7.27 (s, 1H, triazole-H), 7.14 (d, *J* = 2.2 Hz, 1H, Ar-H), 7.06 (ddd, *J* = 10.0, 8.8, 2.5 Hz, 2H, Ar-H), 6.98 – 6.89 (m, 5H, Ar-H), 6.66 (d, *J* = 8.8 Hz, 1H, Ar-H), 6.60 (d, *J* = 8.8 Hz, 1H, Ar-H), 5.18 (s, 2H, CH<sub>2</sub>), 4.26 (t, *J* = 7.1 Hz, 2H, CH<sub>2</sub>), 3.87 (t, *J* = 6.0 Hz, 2H, CH<sub>2</sub>), 1.83 – 1.74

(m,  $J = 7.3$  Hz, 2H, CH<sub>2</sub>), 1.62 – 1.54 (m, 2H, CH<sub>2</sub>), 1.23 – 1.19 (m, 4H, CH<sub>2</sub>). <sup>13</sup>C NMR (100 MHz, CDCl<sub>3</sub>)  $\delta$  152.75, 152.32, 150.99, 150.06, 143.48, 143.44, 142.85, 130.83, 130.70, 130.18, 130.12, 128.13, 127.85, 127.68, 127.61, 124.55, 124.26, 122.42, 122.38, 122.10, 121.95, 121.07, 118.38, 117.68, 116.04, 114.73, 68.71, 63.77, 50.30, 30.10, 28.75, 26.06, 25.25. C<sub>33</sub>H<sub>27</sub>Cl<sub>6</sub>N<sub>3</sub>O<sub>4</sub> [M]<sup>+</sup> 739.0133, [M+2]<sup>+</sup> 741.0103, [M+4]<sup>+</sup> 743.0074, and [M+6]<sup>+</sup> 745.0044 and found 739.0121, 741.0112, 743.0085 and 745.0032.

*4-((5-chloro-2-(2,4-dichlorophenoxy)-4-nitrophenoxy)methyl)-1-(2-(5-chloro-2-(2,4-dichlorophenoxy)phenoxy)ethyl)-1H-1,2,3-triazole (11a)*

Light yellow solid (yield 80%); m.p.: 148-150 °C; <sup>1</sup>H NMR (400 MHz, CDCl<sub>3</sub>)  $\delta$  7.65 (s, 1H, Ar-H), 7.59 (s, 1H, triazole-H), 7.32 (s, 1H, Ar-H), 7.30 (dd,  $J = 11.5, 1.4$  Hz, 2H, Ar-H), 7.14 (dd,  $J = 7.5, 1.4$  Hz, 1H, Ar-H), 7.10 (dd,  $J = 7.5, 1.6$  Hz, 1H, Ar-H), 6.95 (d,  $J = 7.5$  Hz, 1H, Ar-H), 6.92 (d,  $J = 1.4$  Hz, 1H, Ar-H), 6.88 (dd,  $J = 7.5, 1.4$  Hz, 1H, Ar-H), 6.83 (d,  $J = 7.5$  Hz, 1H, Ar-H), 6.78 (d,  $J = 7.5$  Hz, 1H, Ar-H), 5.18 (s, 2H, CH<sub>2</sub>), 4.62 (t,  $J = 4.64$  Hz, 2H, CH<sub>2</sub>), 4.32 (t,  $J = 5.12$  Hz, 2H, CH<sub>2</sub>). <sup>13</sup>C NMR (100 MHz, CDCl<sub>3</sub>)  $\delta$  154.03, 151.75, 150.70, 149.67, 148.49, 146.30, 142.43, 140.16, 133.28, 132.28, 131.09, 130.16, 129.28, 128.08, 127.20, 126.73, 125.63, 124.20, 122.27, 121.92, 120.69, 120.86, 118.63, 117.90, 116.30, 114.29, 67.52, 59.86, 48.35. C<sub>29</sub>H<sub>18</sub>Cl<sub>6</sub>N<sub>4</sub>O<sub>6</sub> [M]<sup>+</sup> 727.9358, [M+2]<sup>+</sup> 729.9328, [M+4]<sup>+</sup> 731.9298, and [M+6]<sup>+</sup> 733.9269 and found 727.9369, 729.9330, 731.9285, 733.9281.

*4-((5-chloro-2-(2,4-dichlorophenoxy)-4-nitrophenoxy)methyl)-1-(3-(5-chloro-2-(2,4-dichlorophenoxy)phenoxy)propyl)-1H-1,2,3-triazole (11b)*

Light yellow solid (yield 78%); m.p.: 181-184 °C; <sup>1</sup>H NMR (500 MHz, CDCl<sub>3</sub>)  $\delta$  7.50 (s, 1H, triazole-H), 7.47 (dd,  $J = 7.4, 1.2$  Hz, 2H, Ar-H), 7.45 (s, 1H, Ar-H), 7.37 (s, 1H, Ar-H), 7.29 (s, 1H, Ar-H), 7.23 (d,  $J = 8.7$  Hz, 1H, Ar-H), 7.13 (d,  $J = 7.7$  Hz, 1H, Ar-H), 6.99 (s, 1H, Ar-H), 6.95 (s, 1H, Ar-H), 6.88 (d,  $J = 8.7$  Hz, 1H, Ar-H), 6.71 (d,  $J = 8.8$  Hz, 1H, Ar-H), 5.32 (s, 2H, CH<sub>2</sub>), 4.35 (t,  $J = 6.6$  Hz, 2H, CH<sub>2</sub>), 3.94 (t,  $J = 5.4$  Hz, 2H, CH<sub>2</sub>), 2.31 (m, 2H, CH<sub>2</sub>). <sup>13</sup>C NMR (125 MHz, CDCl<sub>3</sub>)  $\delta$  152.48, 152.37, 150.20, 150.09, 144.10, 143.02, 141.98, 140.48, 130.80, 130.76, 130.37, 130.26, 128.34, 128.19, 127.87, 126.09, 124.37, 124.28, 123.75, 122.15, 121.86, 120.71, 117.99, 116.97, 116.27, 115.10, 65.12, 63.59, 46.61, 29.45. C<sub>30</sub>H<sub>20</sub>Cl<sub>6</sub>N<sub>4</sub>O<sub>6</sub> [M]<sup>+</sup> 741.9514, [M+2]<sup>+</sup> 743.9484, [M+4]<sup>+</sup> 745.9455, and [M+6]<sup>+</sup> 747.9425 and found 741.9526, 743.9495, 745.9443 and 747.9437.

*4-((5-chloro-2-(2,4-dichlorophenoxy)-4-nitrophenoxy)methyl)-1-(4-(5-chloro-2-(2,4-dichlorophenoxy)phenoxy)butyl)-1H-1,2,3-triazole (11c)*

Brown oil (yield 82%);  $^1\text{H}$  NMR (400 MHz,  $\text{CDCl}_3$ )  $\delta$  7.49 (s, 1H, triazole-H), 7.45 – 7.43 (m, 2H, Ar-H), 7.37 (d,  $J = 2.5$  Hz, 1H, Ar-H), 7.35 (s, 1H, Ar-H), 7.18 (dd,  $J = 8.7, 2.5$  Hz, 1H, Ar-H), 7.06 (dd,  $J = 8.8, 2.5$  Hz, 1H Ar-H), 6.94 (s, 3H, Ar-H), 6.84 (d,  $J = 8.7$  Hz, 1H, Ar-H), 6.62 (d,  $J = 8.8$  Hz, 1H, Ar-H), 5.29 (s, 2H,  $\text{CH}_2$ ), 4.30 (t,  $J = 7.1$  Hz, 2H,  $\text{CH}_2$ ), 3.96 (t,  $J = 5.7$  Hz, 2H,  $\text{CH}_2$ ), 1.91 – 1.83 (m, 2H,  $\text{CH}_2$ ), 1.69 – 1.64 (m, 2H,  $\text{CH}_2$ ).  $^{13}\text{C}$  NMR (100 MHz,)  $\delta$  152.65, 152.46, 150.60, 150.37, 144.04, 142.89, 142.12, 140.52, 130.86, 130.80, 130.30, 130.24, 128.39, 128.00, 127.81, 126.05, 124.57, 124.30, 123.18, 122.19, 121.53, 120.60, 117.86, 117.05, 116.55, 114.83, 68.35, 63.72, 50.00, 27.06, 25.82.  $\text{C}_{31}\text{H}_{22}\text{Cl}_6\text{N}_4\text{O}_6$   $[\text{M}]^+$  755.9670,  $[\text{M}+2]^+$  757.9641,  $[\text{M}+4]^+$  759.9611, and  $[\text{M}+6]^+$  761.9582 and found 755.9682, 757.9653, 759.9622 and 761.9570.

*4-((5-chloro-2-(2,4-dichlorophenoxy)-4-nitrophenoxy)methyl)-1-(5-(5-chloro-2-(2,4-dichlorophenoxy)phenoxy)pentyl)-1H-1,2,3-triazole (11d)*

Light yellow solid (yield 79%); m.p.: 97-99 °C;  $^1\text{H}$  NMR (400 MHz,  $\text{CDCl}_3$ )  $\delta$  7.49 (s, 1H, triazole-H), 7.44 (t,  $J = 1.24$  Hz, 2H, Ar-H), 7.41 (d,  $J = 2.5$  Hz, 1H, Ar-H), 7.36 (s, 1H Ar-H), 7.18 (dd,  $J = 8.7, 2.5$  Hz, 1H, Ar-H), 7.07 (dd,  $J = 8.8, 2.5$  Hz, 1H, Ar-H), 6.95 (s, 1H, Ar-H), 6.92 (dt,  $J = 4.4, 2.2$  Hz, 2H, Ar-H), 6.84 (d,  $J = 8.7$  Hz, 1H, Ar-H), 6.61 (d,  $J = 8.8$  Hz, 1H, Ar-H), 5.30 (s, 2H,  $\text{CH}_2$ ), 4.26 (t,  $J = 7.2$  Hz, 2H,  $\text{CH}_2$ ), 3.89 (t,  $J = 5.9$  Hz, 2H,  $\text{CH}_2$ ), 1.88-1.80 (m, 2H,  $\text{CH}_2$ ), 1.69 – 1.62 (m, 2H,  $\text{CH}_2$ ), 1.24 (s, 2H,  $\text{CH}_2$ ).  $^{13}\text{C}$  NMR (100 MHz,  $\text{CDCl}_3$ )  $\delta$  152.71, 152.63, 150.82, 150.40, 144.01, 142.88, 142.12, 140.54, 130.85, 130.80, 130.30, 130.14, 128.38, 127.75, 127.70, 126.01, 124.58, 124.32, 123.03, 122.36, 121.26, 120.56, 117.83, 117.06, 116.60, 114.79, 68.61, 63.74, 50.42, 29.77, 28.35, 23.06.  $\text{C}_{32}\text{H}_{24}\text{Cl}_6\text{N}_4\text{O}_6$   $[\text{M}]^+$  769.9827,  $[\text{M}+2]^+$  771.9797,  $[\text{M}+4]^+$  773.9768, and  $[\text{M}+6]^+$  775.9738 and found 769.9838, 771.9786, 773.9755 and 775.9749.

*4-((5-chloro-2-(2,4-dichlorophenoxy)-4-nitrophenoxy)methyl)-1-(6-(5-chloro-2-(2,4-dichlorophenoxy)phenoxy)hexyl)-1H-1,2,3-triazole (11e)*

Brown solid (yield 81%); m.p.: 111-113 °C;  $^1\text{H}$  NMR (400 MHz,  $\text{CDCl}_3$ )  $\delta$  7.49 (s, 1H, triazole-H), 7.44 (d,  $J = 2.5$  Hz, 1H, Ar-H), 7.37 (d,  $J = 2.5$  Hz, 1H, Ar-H), 7.35 (s, 1H, Ar-H), 7.18 (dd,  $J = 8.7, 2.5$  Hz, 1H, Ar-H), 7.04 (dd,  $J = 8.8, 2.5$  Hz, 1H, Ar-H), 6.96 (dd,  $J = 7.5, 1.3$  Hz, 2H, Ar-H), 6.92 (s, 2H, Ar-H), 6.84 (d,  $J = 8.7$  Hz, 1H, Ar-H), 6.59 (d,  $J = 8.8$  Hz, 1H, Ar-H), 5.30 (s, 2H,  $\text{CH}_2$ ), 4.29 (t,  $J = 7.2$  Hz, 2H,  $\text{CH}_2$ - $\text{CH}_2$ ), 3.87 (t,  $J = 6.0$  Hz, 2H,  $\text{CH}_2$ - $\text{CH}_2$ ), 1.85 – 1.78 (m, 4H,  $\text{CH}_2$ - $\text{CH}_2$ ), 1.62 – 1.55 (m, 4H,  $\text{CH}_2$ - $\text{CH}_2$ ).  $^{13}\text{C}$  NMR (125 MHz,  $\text{CDCl}_3$ )  $\delta$  152.68, 152.55, 150.90, 150.35, 143.94, 142.79, 142.05, 140.49, 130.78, 130.71, 130.20,

130.03, 128.29, 127.59, 127.53, 125.93, 124.51, 124.17, 122.89, 122.35, 121.05, 120.45, 117.62, 117.02, 116.56, 114.71, 68.64, 63.72, 50.33, 30.02, 28.67, 25.97, 25.16.  $C_{33}H_{26}Cl_6N_4O_6$   $[M]^+$  783.9983,  $[M+2]^+$  785.9954,  $[M+4]^+$  787.9924, and  $[M+6]^+$  789.9895 and found 783.9995, 785.9965, 787.9912 and 789.9884.

*5-chloro-4-(((1-(2-(5-chloro-2-(2,4-dichlorophenoxy)phenoxy)ethyl)-1H-1,2,3-triazol-4-yl)methyl)amino)-2-(2,4-dichlorophenoxy)phenol (12a)*

Light yellow solid (yield 81%); m.p.: 152-155 °C;  $^1H$  NMR (400 MHz,  $CDCl_3$ )  $\delta$  7.46 (s, 1H, triazole-H), 7.43 (s, 1H, Ar-H), 7.42 – 7.40 (dd,  $J = 2.9, 2.6$  Hz, 2H, Ar-H), 7.36 (s, 1H), 7.16 (dd,  $J = 8.7, 2.5$  Hz, 1H, Ar-H), 7.07 (dd,  $J = 8.8, 2.5$  Hz, 1H, Ar-H), 6.98 (dd,  $J = 8.5, 2.3$  Hz, 1H, Ar-H), 6.93 (d,  $J = 2.1$  Hz, 2H, Ar-H), 6.90 (s, NH-exchangeable with  $D_2O$ ), 6.83 (d,  $J = 8.7$  Hz, 1H, Ar-H), 6.55 (d,  $J = 8.8$  Hz, 1H, Ar-H), 5.20 (s, 2H,  $CH_2$ ), 4.66 (t,  $J = 4.48$  Hz, 2H,  $CH_2$ ), 4.33 (t,  $J = 4.52$  Hz, 2H,  $CH_2$ ).  $^{13}C$  NMR (100 MHz,  $CDCl_3$ )  $\delta$  152.70, 152.11, 150.27, 149.69, 144.15, 142.76, 142.08, 140.44, 130.99, 130.81, 130.42, 130.35, 128.38, 128.23, 128.06, 126.17, 124.83, 124.44, 124.19, 122.6, 122.32, 120.80, 117.73, 117.04, 116.32, 115.19, 67.58, 63.30, 49.80.  $C_{29}H_{20}Cl_6N_4O_4$   $[M]^+$  697.9616,  $[M+2]^+$  699.9586  $[M+4]^+$  701.9557, and  $[M+6]^+$  703.9527 and found 697.9605, 699.9574, 701.9568 and 703.9537.

*5-chloro-4-(((1-(3-(5-chloro-2-(2,4-dichlorophenoxy)phenoxy)propyl)-1H-1,2,3-triazol-4-yl)methyl)amino)-2-(2,4-dichlorophenoxy)phenol (12b)*

Light yellow solid (yield 84%); m.p.: 168-171 °C;  $^1H$  NMR (500 MHz,  $CDCl_3$ )  $\delta$  7.50 (s, 1H, triazole-H), 7.47 (dd,  $J = 7.4, 1.9$  Hz, 2H, Ar-H), 7.44 (s, 1H, Ar-H), 7.37 (s, 1H, Ar-H), 7.29 (s, 1H, Ar-H), 7.23 (dd,  $J = 8.7, 1.7$  Hz, 1H, Ar-H), 7.13 (dd,  $J = 8.7, 1.8$  Hz, 1H, Ar-H), 6.99 (s, 1H, Ar-H), 6.95 (s, 1H, Ar-H), 6.89 (d,  $J = 8.7$  Hz, 1H, Ar-H), 6.71 (d,  $J = 8.8$  Hz, 1H, Ar-H), 5.32 (s, 2H,  $CH_2$ ), 4.35 (t,  $J = 6.7$  Hz, 2H,  $CH_2$ ), 3.94 (t,  $J = 5.5$  Hz, 2H,  $CH_2$ ), 2.31 (dt,  $J = 12.1, 6.0$  Hz, 2H,  $CH_2$ ).  $^{13}C$  NMR (125 MHz,  $CDCl_3$ )  $\delta$  152.48, 152.37, 150.20, 150.09, 144.10, 143.02, 141.98, 130.80, 130.73, 130.37, 130.26, 128.34, 128.19, 127.87, 126.09, 124.37, 124.28, 123.75, 122.15, 121.86, 120.71, 117.99, 116.97, 116.26, 115.10, 65.11, 63.59, 46.61, 29.44.  $C_{30}H_{22}Cl_6N_4O_4$   $[M]^+$  711.9772,  $[M+2]^+$  713.9743,  $[M+4]^+$  715.9713, and  $[M+6]^+$  717.9684 and found 711.9784, 713.9731, 715.9724 and 717.9694.

*5-chloro-4-(((1-(4-(5-chloro-2-(2,4-dichlorophenoxy)phenoxy)butyl)-1H-1,2,3-triazol-4-yl)methyl)amino)-2-(2,4-dichlorophenoxy)phenol (12c)*

Light yellow solid (yield 81%); m.p.: 107-110 °C; <sup>1</sup>H NMR (400 MHz, CDCl<sub>3</sub>) δ 7.49 (s, 1H, triazole-H), 7.44 (d, *J* = 2.8 Hz, 2H, Ar-H), 7.38 (d, *J* = 2.5 Hz, 1H, Ar-H), 7.35 (s, 1H, Ar-H), 7.18 (dd, *J* = 8.7, 2.5 Hz, 1H, Ar-H), 7.06 (dd, *J* = 8.8, 2.5 Hz, 1H, Ar-H), 6.94 (s, 3H, Ar-H), 6.84 (d, *J* = 8.7 Hz, 1H, Ar-H), 6.62 (d, *J* = 8.8 Hz, 1H, Ar-H), 5.29 (s, 2H, CH<sub>2</sub>), 4.30 (t, *J* = 7.1 Hz, 2H, CH<sub>2</sub>), 3.96 (t, *J* = 5.8 Hz, 2H, CH<sub>2</sub>), 1.86 (m, 2H, CH<sub>2</sub>), 1.68 – 1.64 (m, 2H, CH<sub>2</sub>). <sup>13</sup>C NMR (126 MHz, CDCl<sub>3</sub>) δ 152.60, 152.40, 150.53, 150.31, 143.98, 142.84, 142.05, 140.46, 130.81, 130.74, 130.24, 130.18, 130.14, 128.32, 127.94, 127.74, 125.98, 124.50, 124.24, 123.12, 122.12, 121.47, 120.54, 117.79, 117.00, 116.49, 114.77, 68.29, 63.66, 49.93, 26.99, 25.75. C<sub>31</sub>H<sub>24</sub>Cl<sub>6</sub>N<sub>4</sub>O<sub>4</sub> [M]<sup>+</sup> 725.9929, [M+2]<sup>+</sup> 727.9899, [M+4]<sup>+</sup> 729.9870, and [M+6]<sup>+</sup> 731.9840 and found 725.9940, 727.9888, 729.9882 and 731.9830.

*5-chloro-4-(((1-(5-(5-chloro-2-(2,4-dichlorophenoxy)phenoxy)pentyl)-1H-1,2,3-triazol-4-yl)methyl)amino)-2-(2,4-dichlorophenoxy)phenol (12d)*

Brown oil (yield 68%); <sup>1</sup>H NMR (400 MHz, CDCl<sub>3</sub>) δ 7.49 (s, 1H, triazole-H), 7.44 (s, 1H, Ar-H), 7.41 (d, *J* = 2.5 Hz, 1H, Ar-H), 7.35 (s, 1H, Ar-H), 7.18 (dd, *J* = 8.7, 2.5 Hz, 1H, Ar-H), 7.07 (dd, *J* = 8.8, 2.5 Hz, 1H, Ar-H), 6.97 – 6.90 (m, 4H, Ar-H), 6.84 (d, *J* = 8.7 Hz, 1H, Ar-H), 6.61 (dd, *J* = 8.8, 2.2 Hz, 1H, Ar-H), 5.30 (s, 2H, -CH<sub>2</sub>), 4.25 (t, *J* = 7.2 Hz, 2H, CH<sub>2</sub>-CH<sub>2</sub>), 3.89 (t, *J* = 4.8 Hz, 2H, CH<sub>2</sub>-CH<sub>2</sub>), 1.84 (m, 2H, CH<sub>2</sub>-CH<sub>2</sub>), 1.69 – 1.61 (m, 2H, CH<sub>2</sub>-CH<sub>2</sub>). <sup>13</sup>C NMR (125 MHz, CDCl<sub>3</sub>) δ 152.63, 152.55, 150.74, 150.32, 143.94, 142.81, 142.04, 140.46, 130.72, 130.22, 130.06, 128.31, 127.68, 127.62, 126.31, 125.93, 124.51, 124.25, 122.96, 122.28, 121.19, 120.49, 117.75, 116.99, 116.53, 114.72, 68.54, 63.69, 50.35, 29.74, 28.28, 22.99. C<sub>32</sub>H<sub>26</sub>Cl<sub>6</sub>N<sub>4</sub>O<sub>4</sub> [M]<sup>+</sup> 740.0085, [M+2]<sup>+</sup> 742.0056, [M+4]<sup>+</sup> 744.0026, and [M+6]<sup>+</sup> 746.0093 and found 740.0076, 742.0067, 744.0037 and 746.0080.

*5-chloro-4-(((1-(6-(5-chloro-2-(2,4-dichlorophenoxy)phenoxy)hexyl)-1H-1,2,3-triazol-4-yl)methyl)amino)-2-(2,4-dichlorophenoxy)phenol (12e)*

Light yellow solid (yield 78%); m.p.: 108-110 °C; <sup>1</sup>H NMR (400 MHz, CDCl<sub>3</sub>) δ 7.50 (s, 1H, Ar-H), 7.45 (s, 1H, Ar-H), 7.44 (d, *J* = 2.5 Hz, 1H, Ar-H), 7.38 (d, *J* = 2.5 Hz, 1H, Ar-H), 7.35 (s, 1H, Ar-H), 7.18 (dd, *J* = 8.7, 2.5 Hz, 1H, Ar-H), 7.05 (dd, *J* = 8.8, 2.5 Hz, 1H, Ar-H), 6.95 (t, *J* = 1.1 Hz, 1H, Ar-H), 6.92 (s, 2H, Ar-H), 6.84 (d, *J* = 8.7 Hz, 1H, Ar-H), 6.60 (d, *J* = 8.8 Hz, 1H, Ar-H), 5.30 (s, 2H), 4.30 (t, *J* = 7.2 Hz, 2H), 3.87 (t, *J* = 6.0 Hz, 2H), 1.85 – 1.78 (m, 2H), 1.62 – 1.57 (m, 2H), 1.24 (s, 4H). <sup>13</sup>C NMR (100 MHz, CDCl<sub>3</sub>) δ 152.76, 152.63, 150.97,

150.41, 144.02, 142.83, 142.12, 140.55, 130.87, 130.79, 130.29, 130.10, 128.37, 127.65, 127.61, 126.01, 124.59, 124.23, 122.99, 122.44, 121.12, 120.55, 117.68, 117.06, 116.62, 114.75, 68.68, 63.76, 50.42, 30.09, 29.77, 28.74, 25.23.  $C_{33}H_{28}Cl_6N_4O_4$   $[M]^+$  754.0242,  $[M+2]^+$  756.0212,  $[M+4]^+$  758.0183, and  $[M+6]^+$  760.0153 and found 754.0253, 756.0225, 758.0194 and 760.0164.

### Scanned copies of NMR of synthesized compounds.

#### *1,2-bis(5-chloro-2-(2,4-dichlorophenoxy)phenoxy)ethane (3a)*

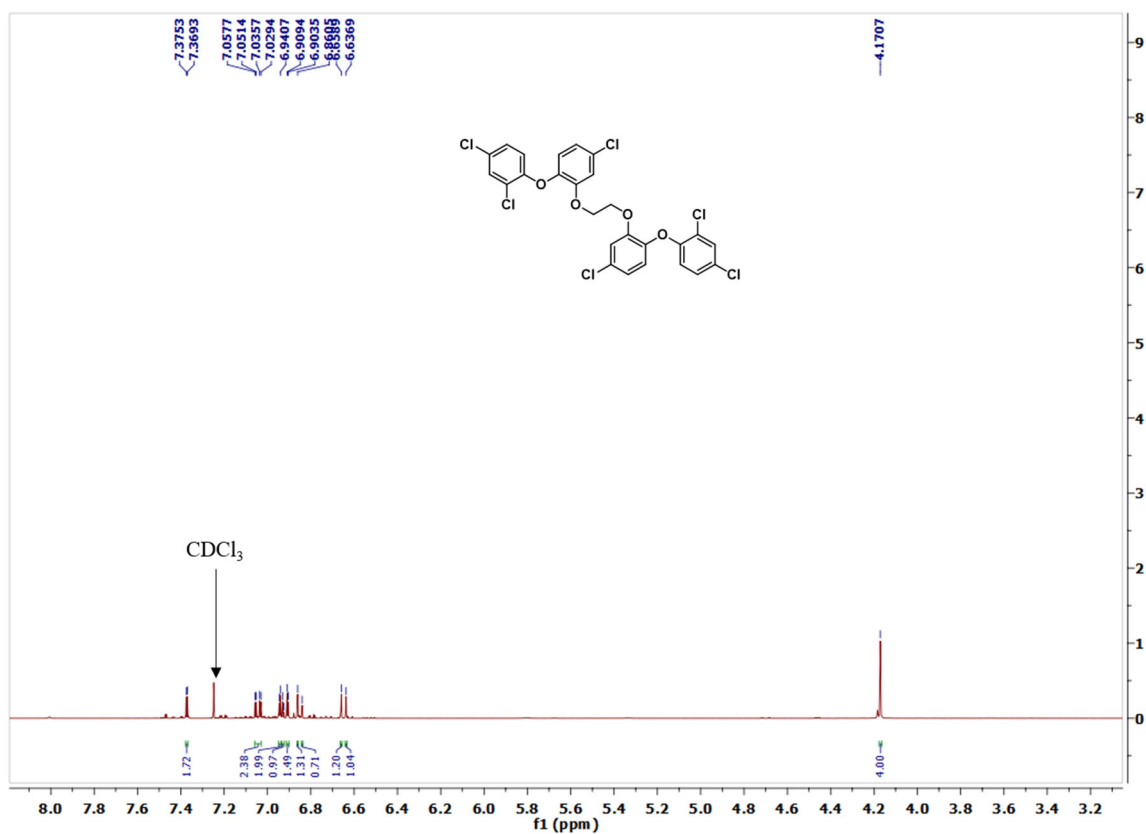

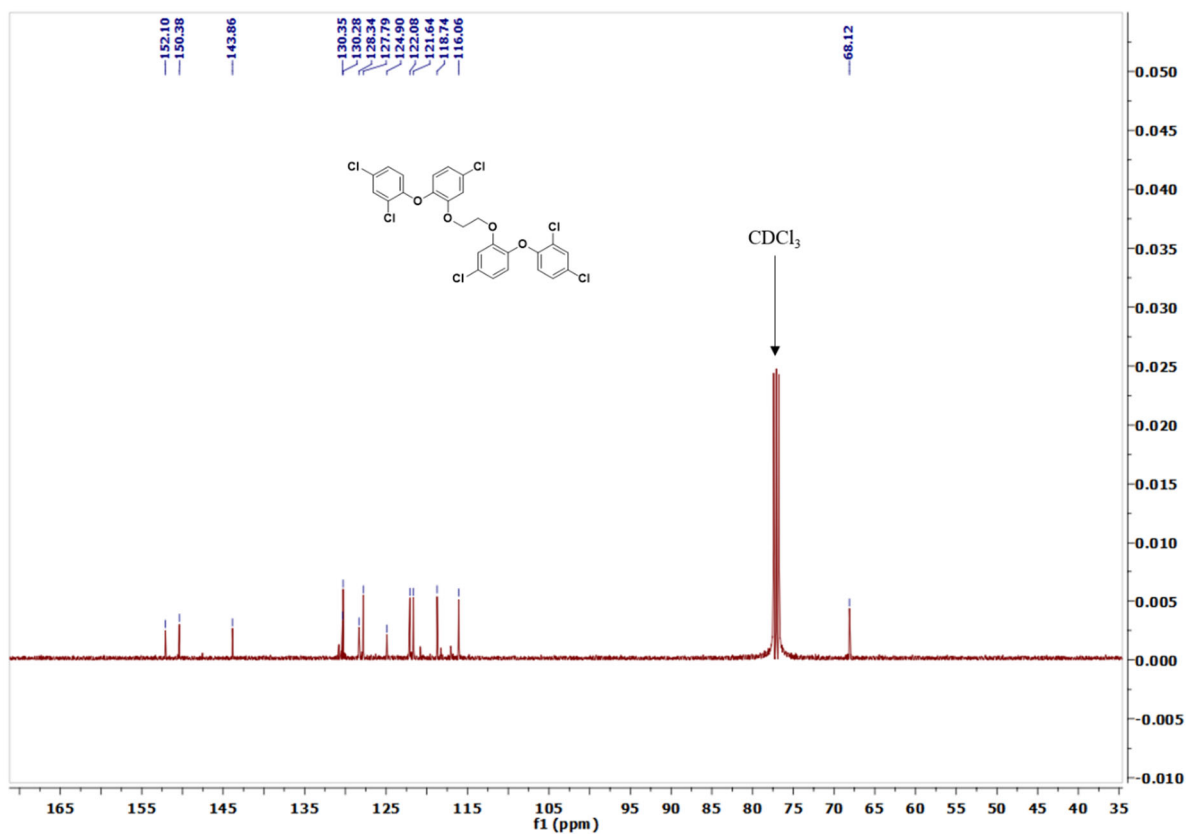

1,3-bis(5-chloro-2-(2,4-dichlorophenoxy)phenoxy)propane (3b)

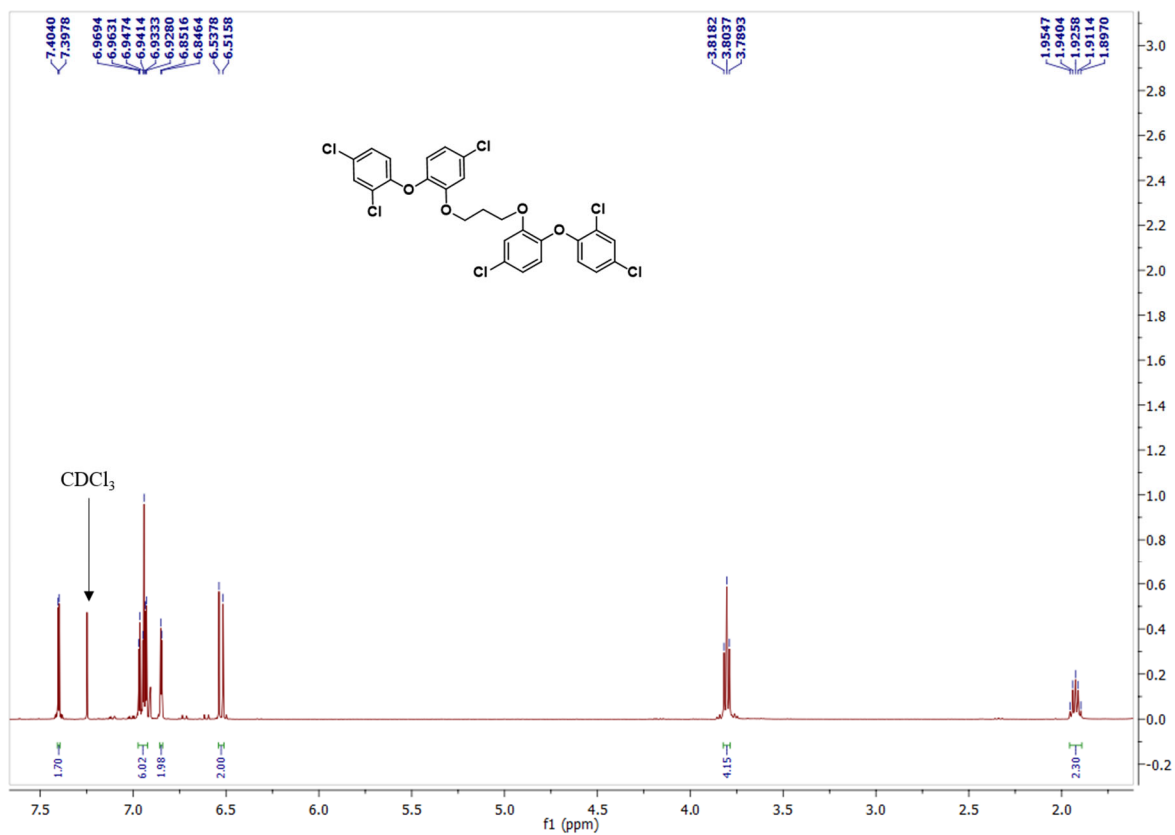

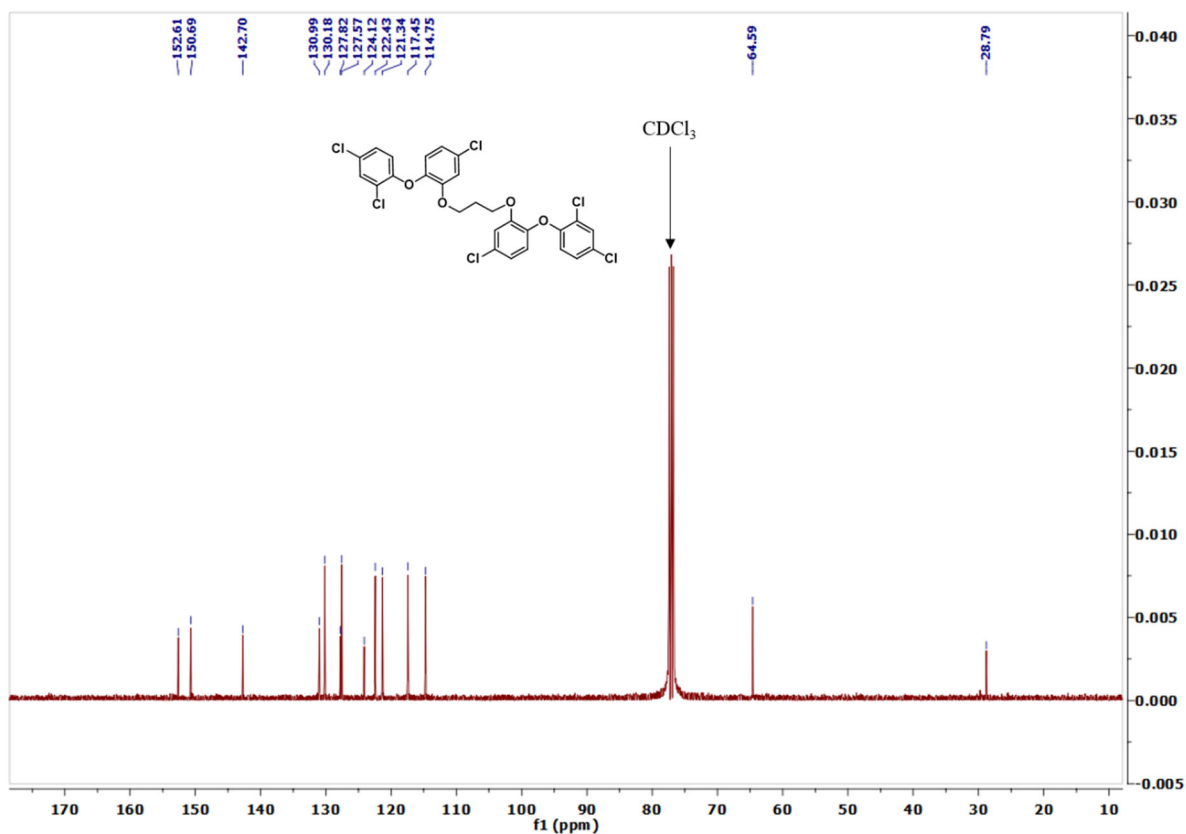

1,4-bis(5-chloro-2-(2,4-dichlorophenoxy)phenoxy)butane (3c)

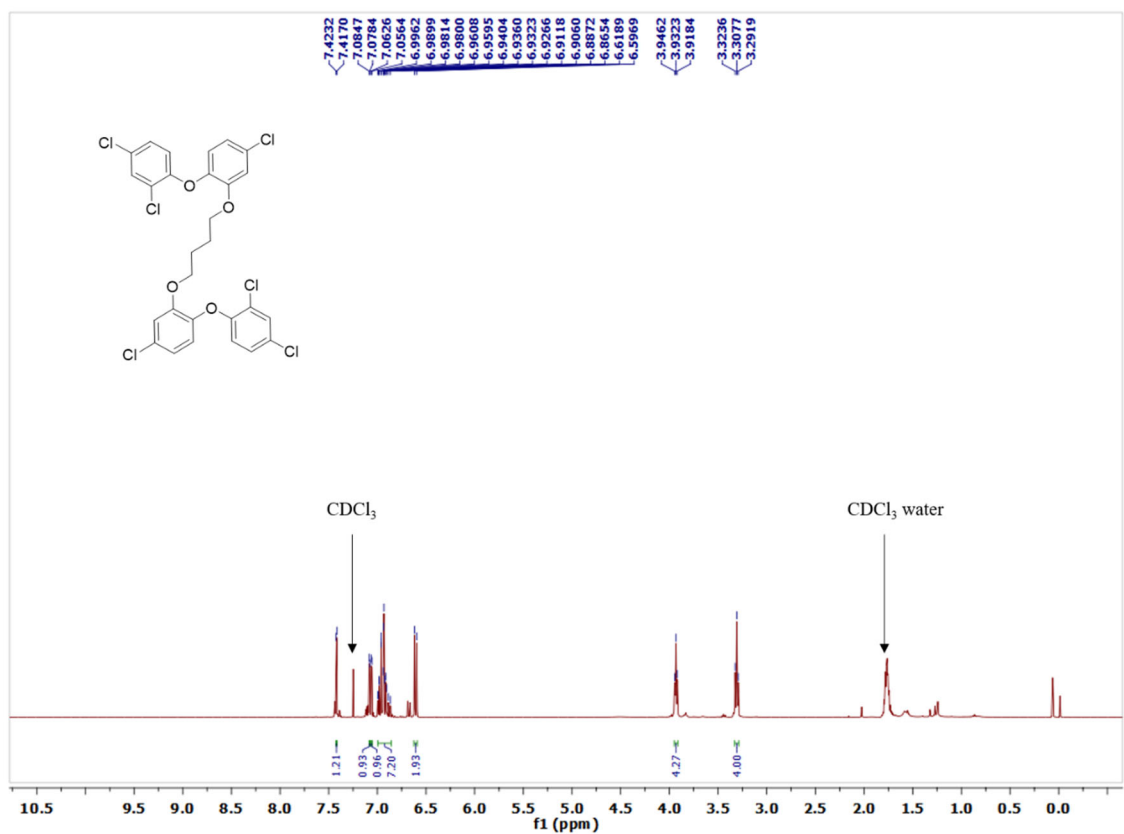



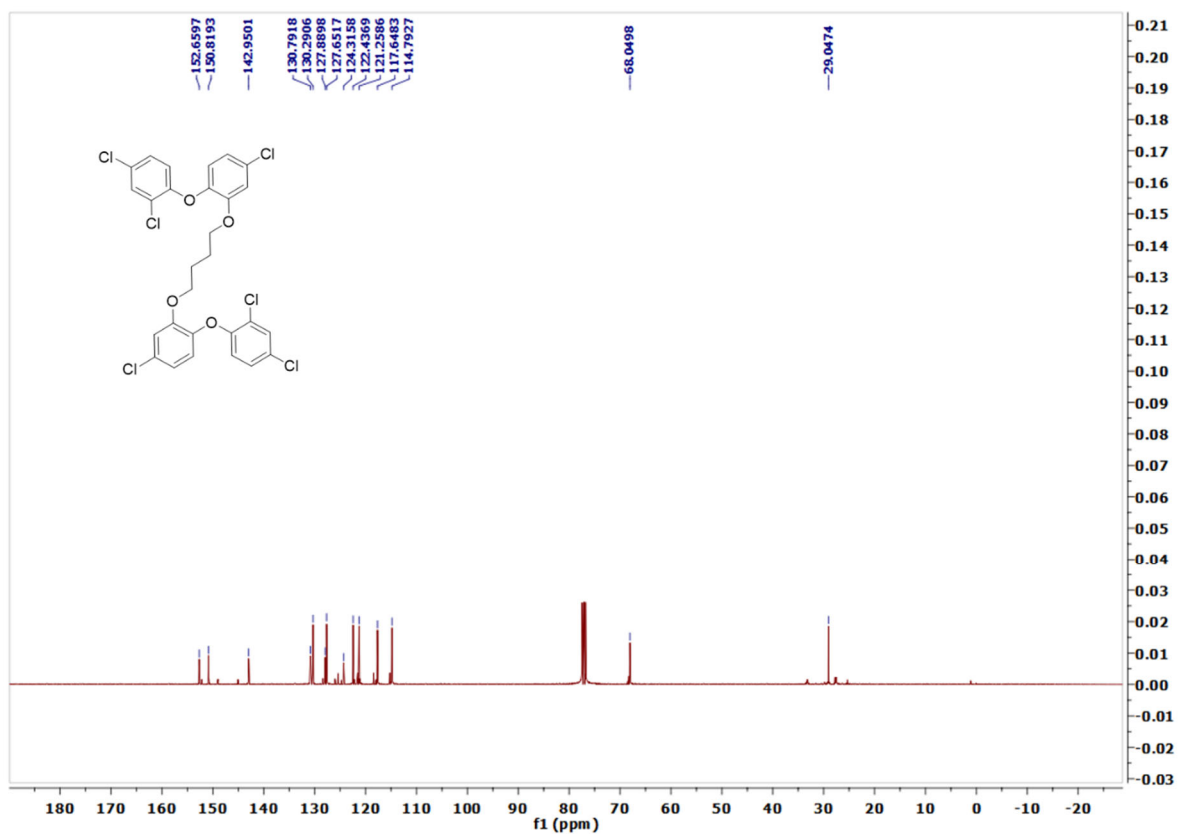

1,5-bis(5-chloro-2-(2,4-dichlorophenoxy)phenoxy)pentane (3d)

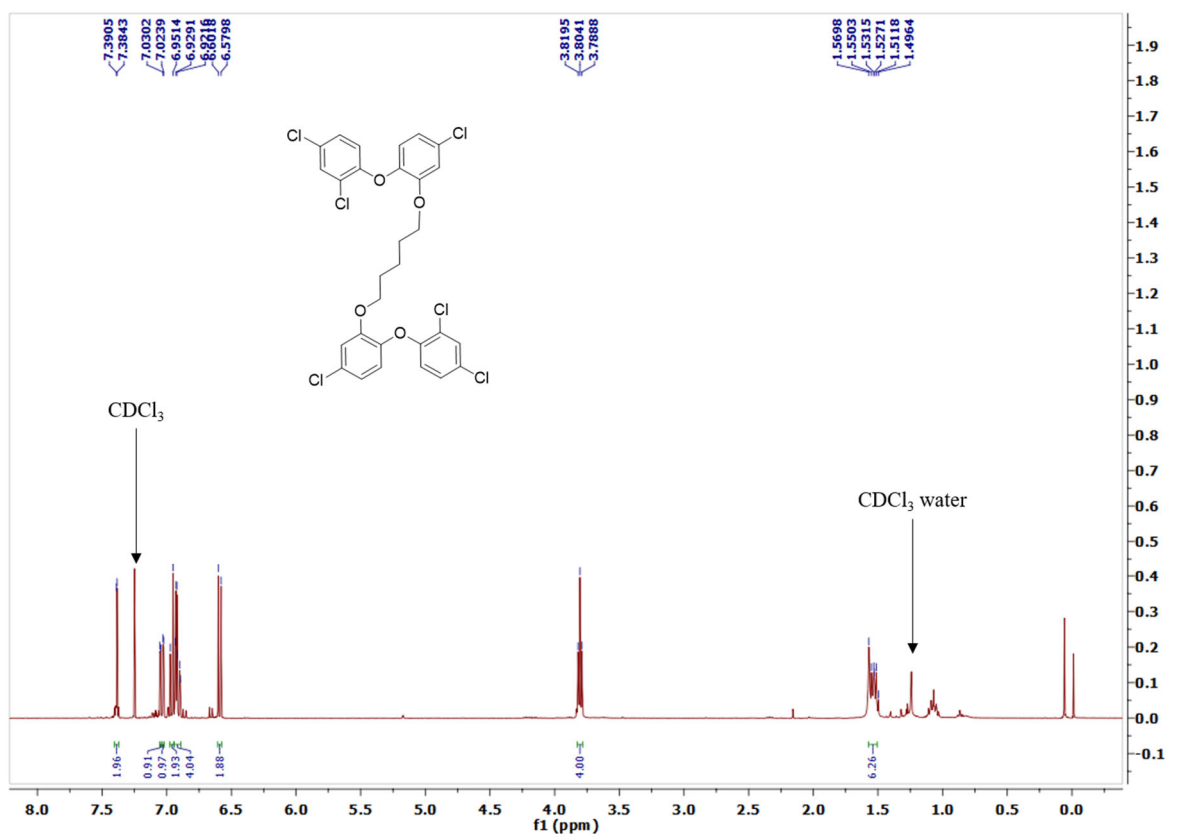

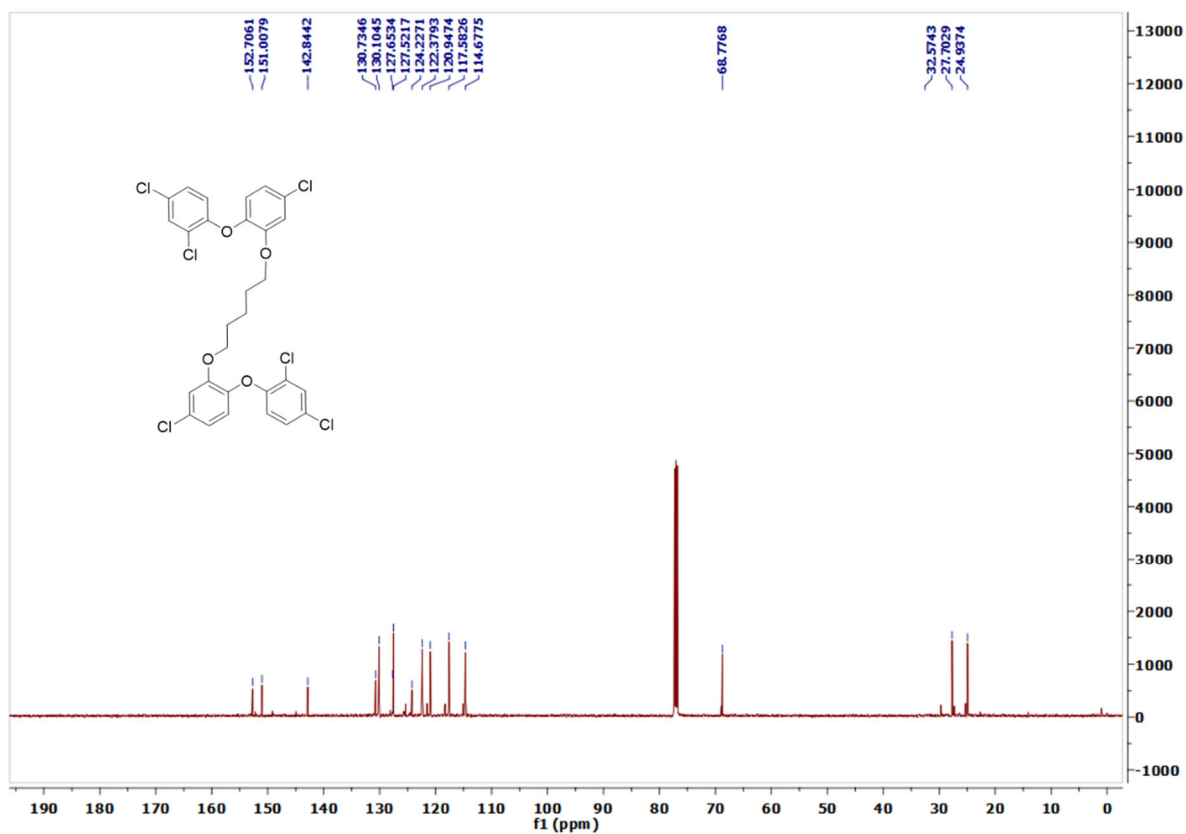

*1-(2-(5-chloro-2-(2,4-dichlorophenoxy)phenoxy)ethyl)-4-((5-chloro-2-(2,4-dichlorophenoxy)phenoxy)methyl)-1H-1,2,3-triazole (10a)*

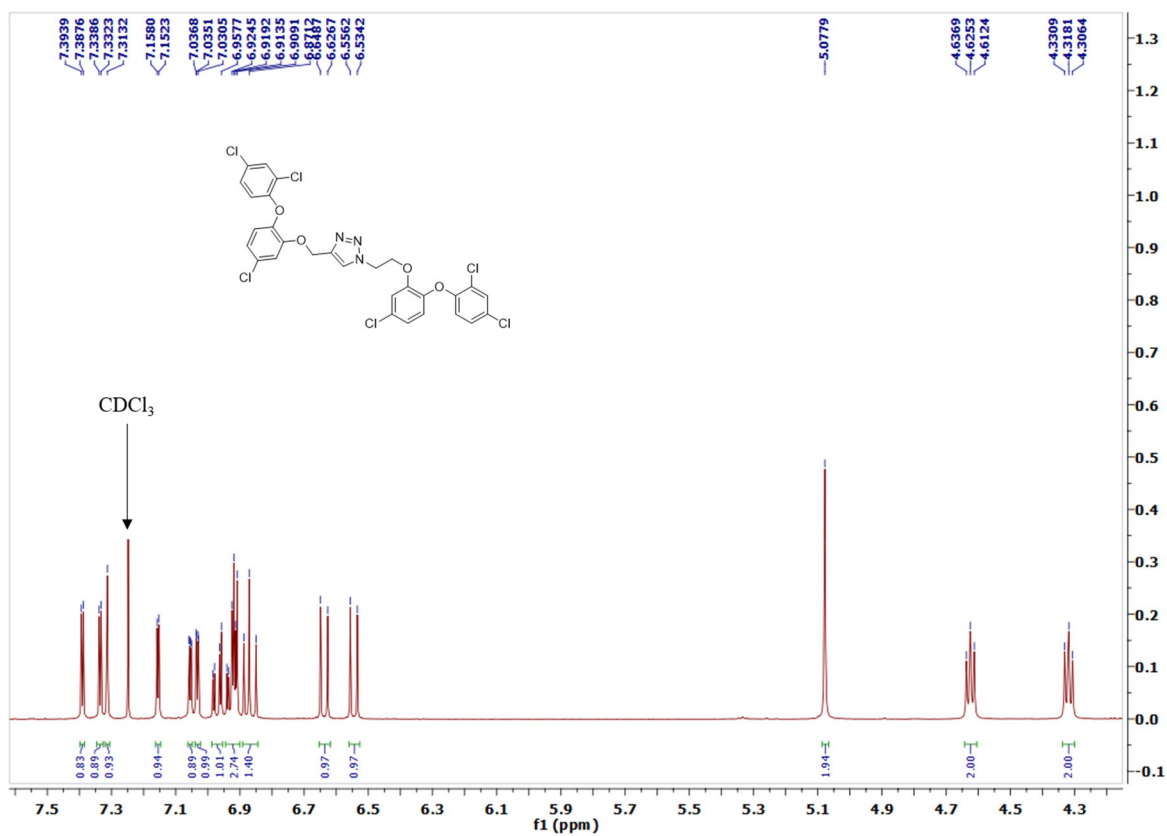

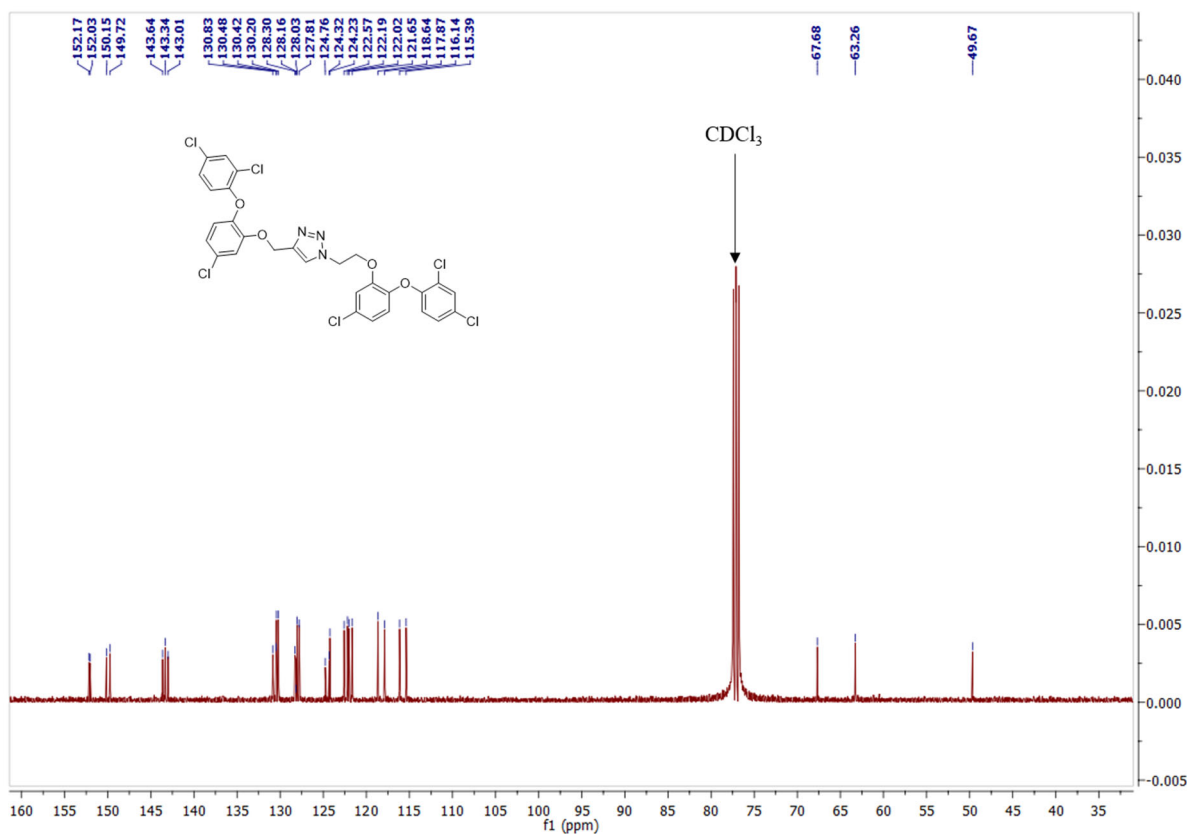

4-((5-chloro-2-(2,4-dichlorophenoxy)phenoxy)methyl)-1-(3-(5-chloro-2-(2,4-dichlorophenoxy)phenoxy)propyl)-1H-1,2,3-triazole (**10b**)

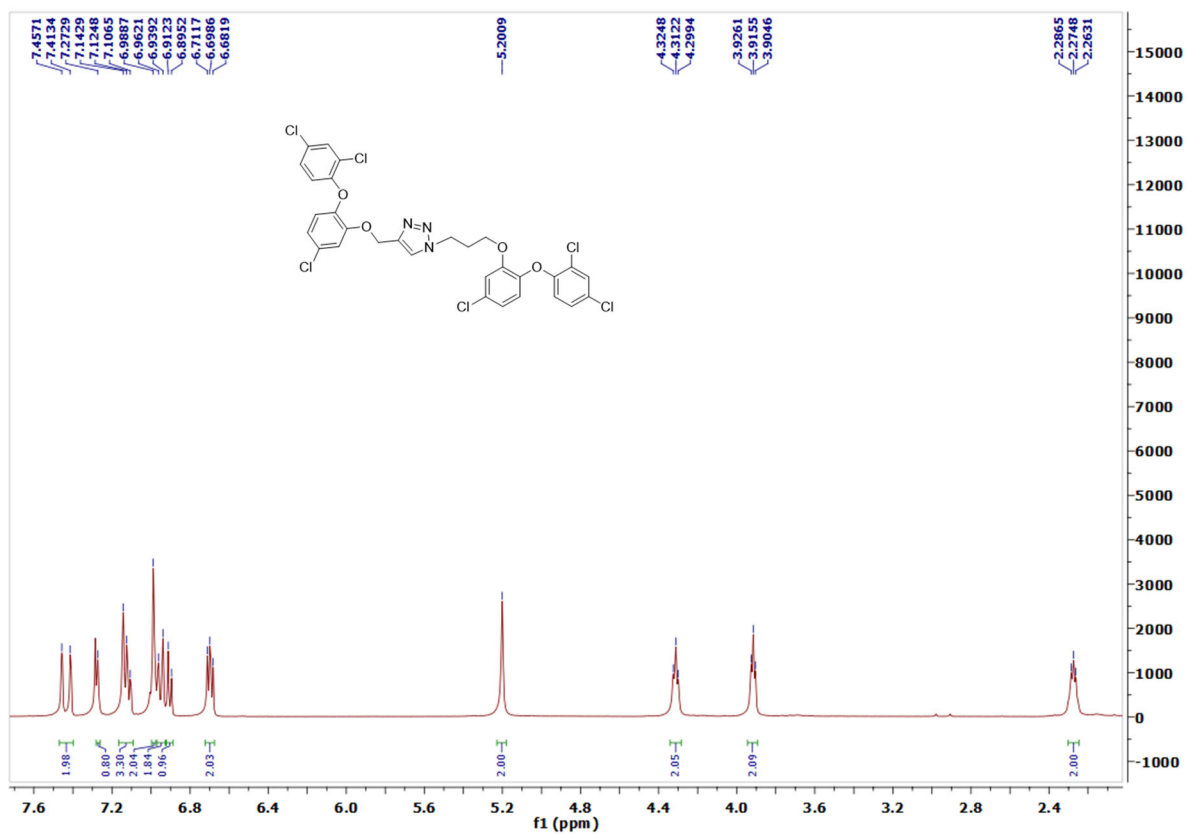

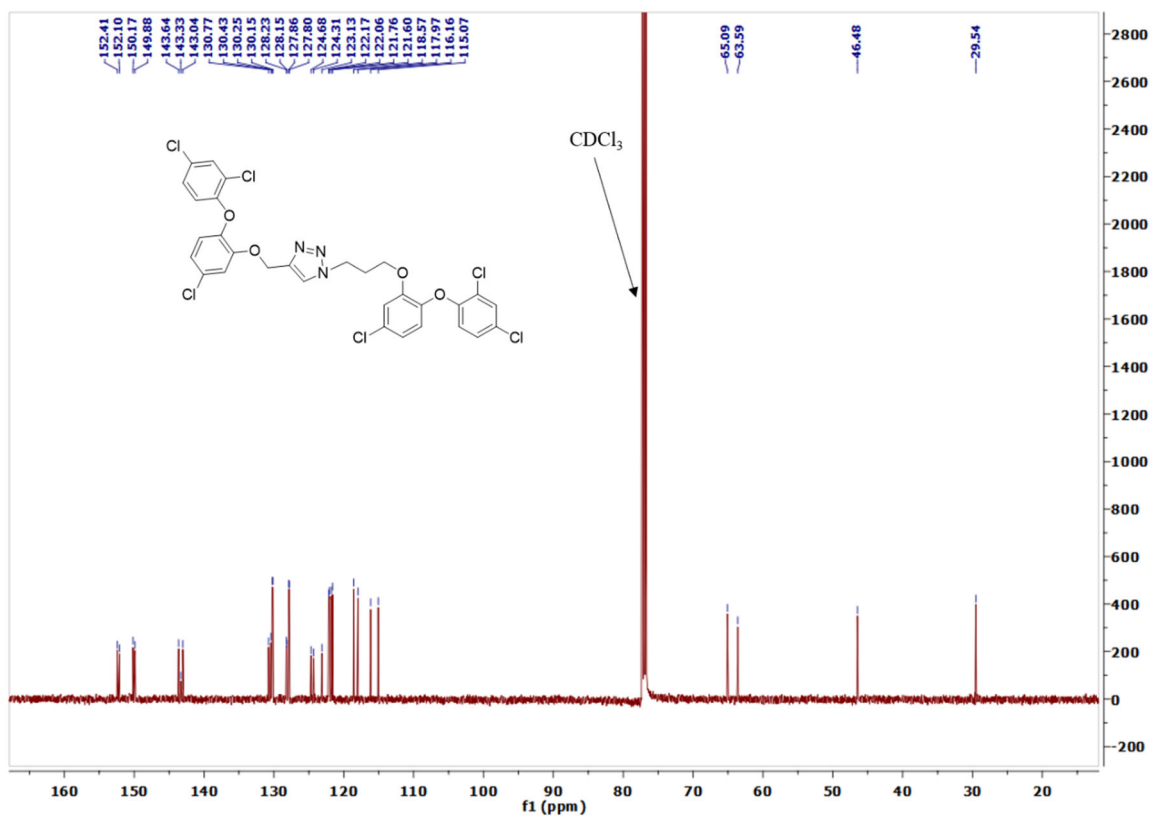

1-(4-(5-chloro-2-(2,4-dichlorophenoxy)phenoxy)butyl)-4-((5-chloro-2-(2,4-dichlorophenoxy)phenoxy)methyl)-1H-1,2,3-triazole (10c)

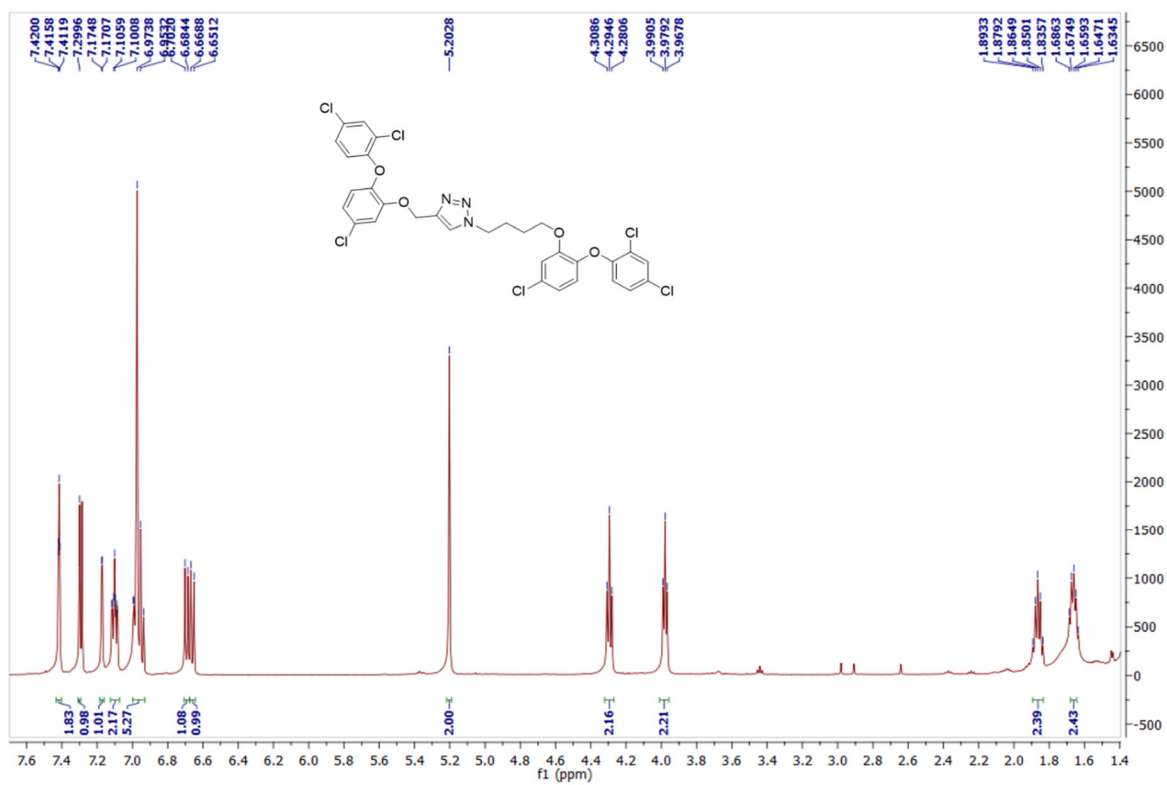

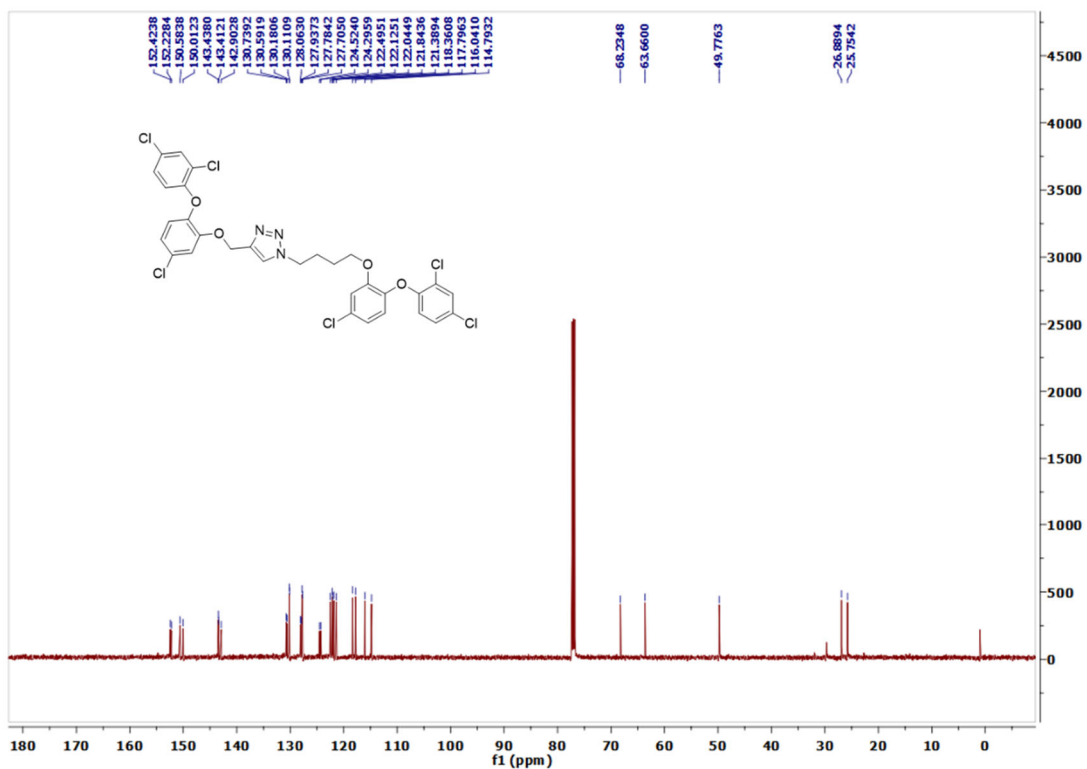

4-((5-chloro-2-(2,4-dichlorophenoxy)phenoxy)methyl)-1-(5-(5-chloro-2-(2,4-dichlorophenoxy)phenoxy)pentyl)-1H-1,2,3-triazole (**10d**)

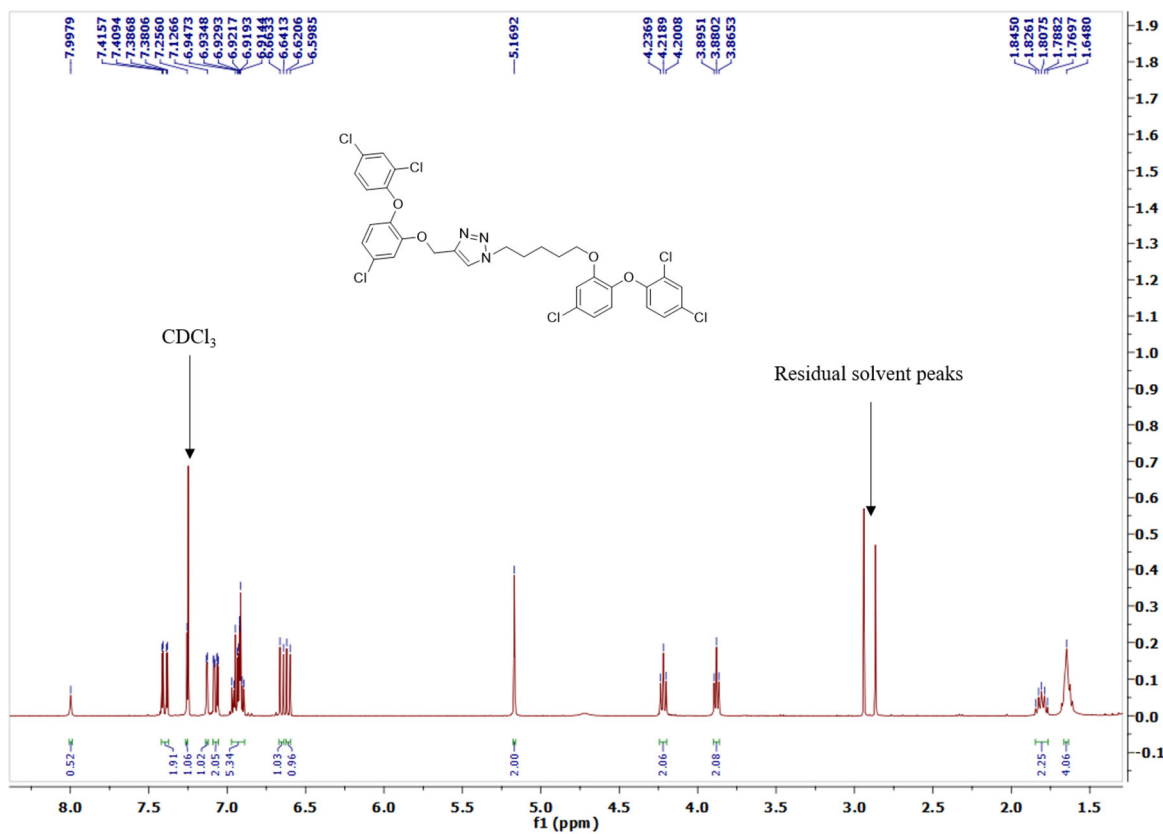

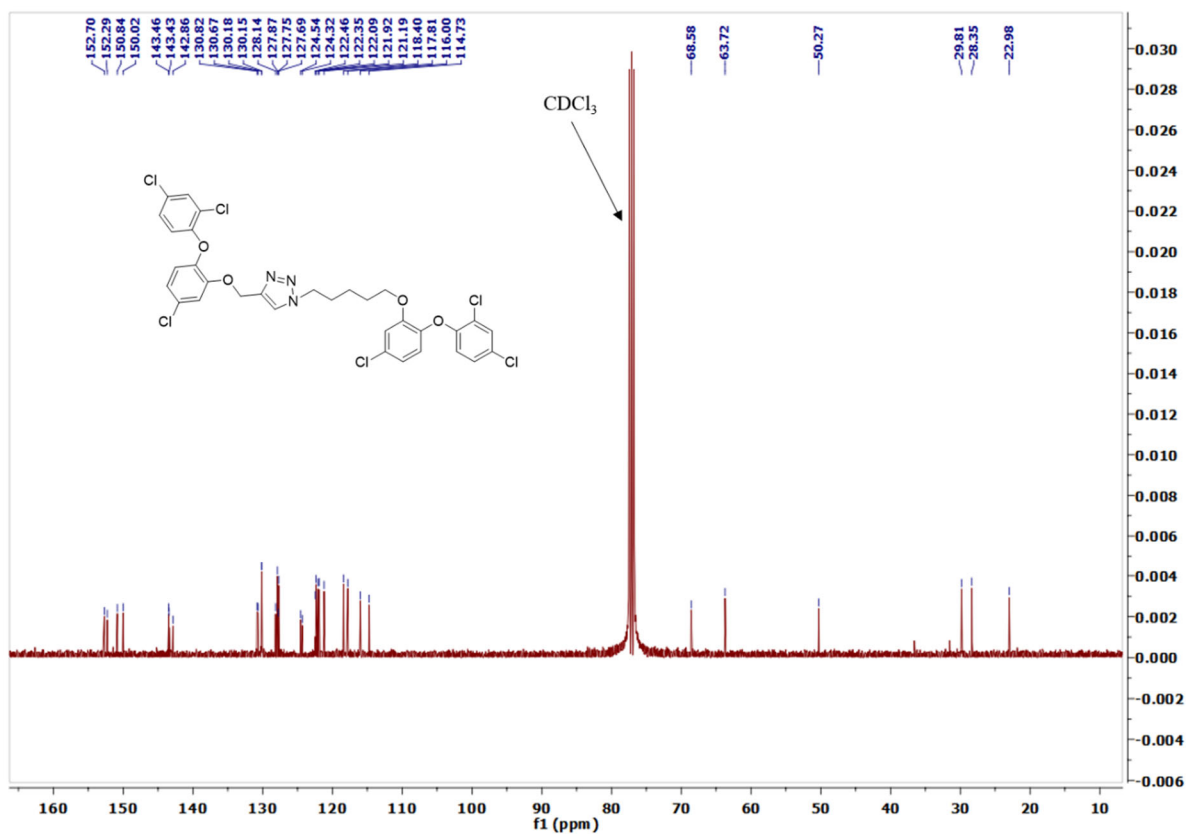

*1-(6-(5-chloro-2-(2,4-dichlorophenoxy)phenoxy)hexyl)-4-((5-chloro-2-(2,4-dichlorophenoxy)phenoxy)methyl)-1H-1,2,3-triazole (10e)*

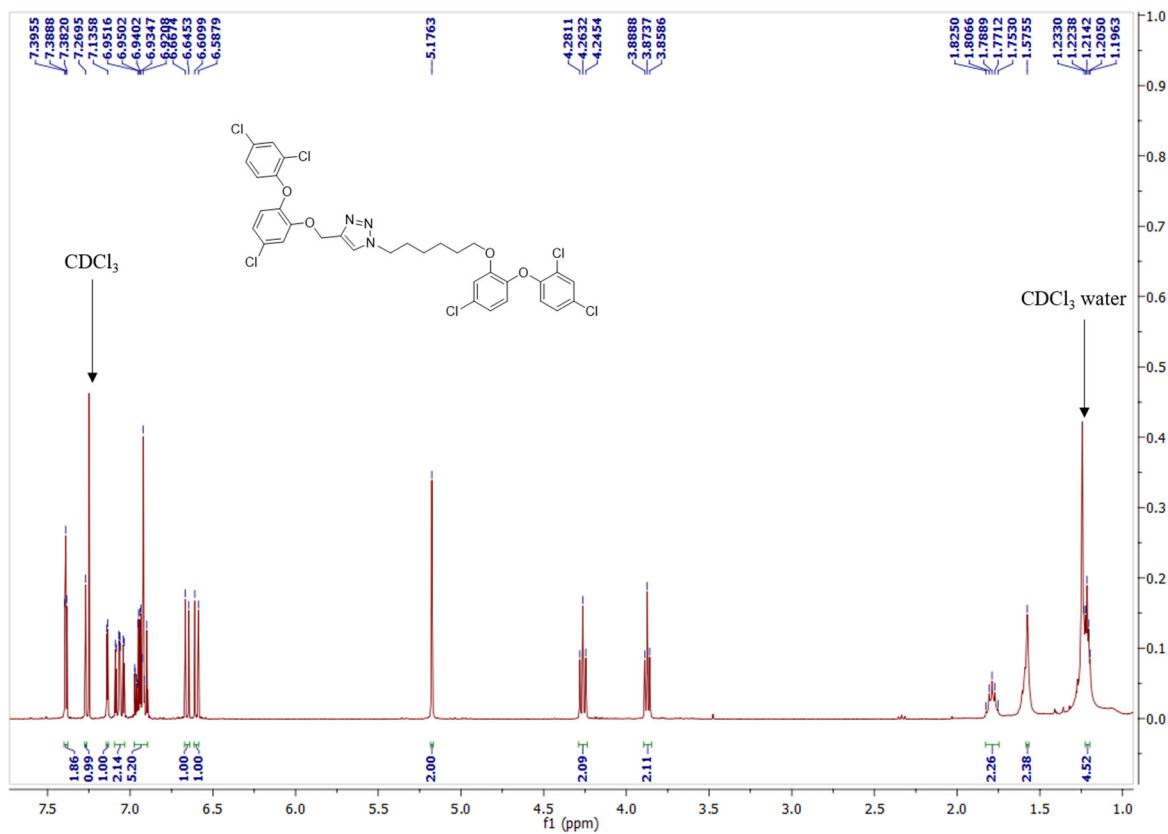

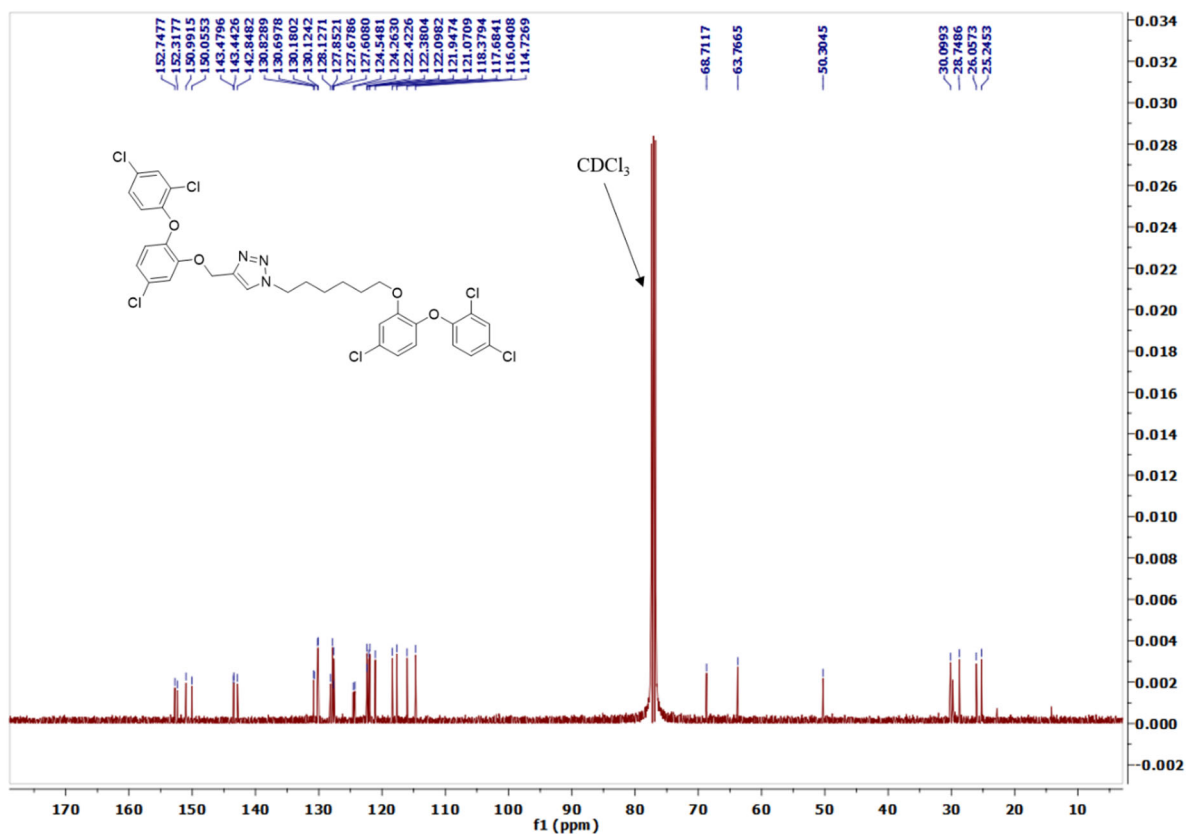

4-((5-chloro-2-(2,4-dichlorophenoxy)-4-nitrophenoxy)methyl)-1-(3-(5-chloro-2-(2,4-dichlorophenoxy)phenoxy)propyl)-1H-1,2,3-triazole (**11b**)

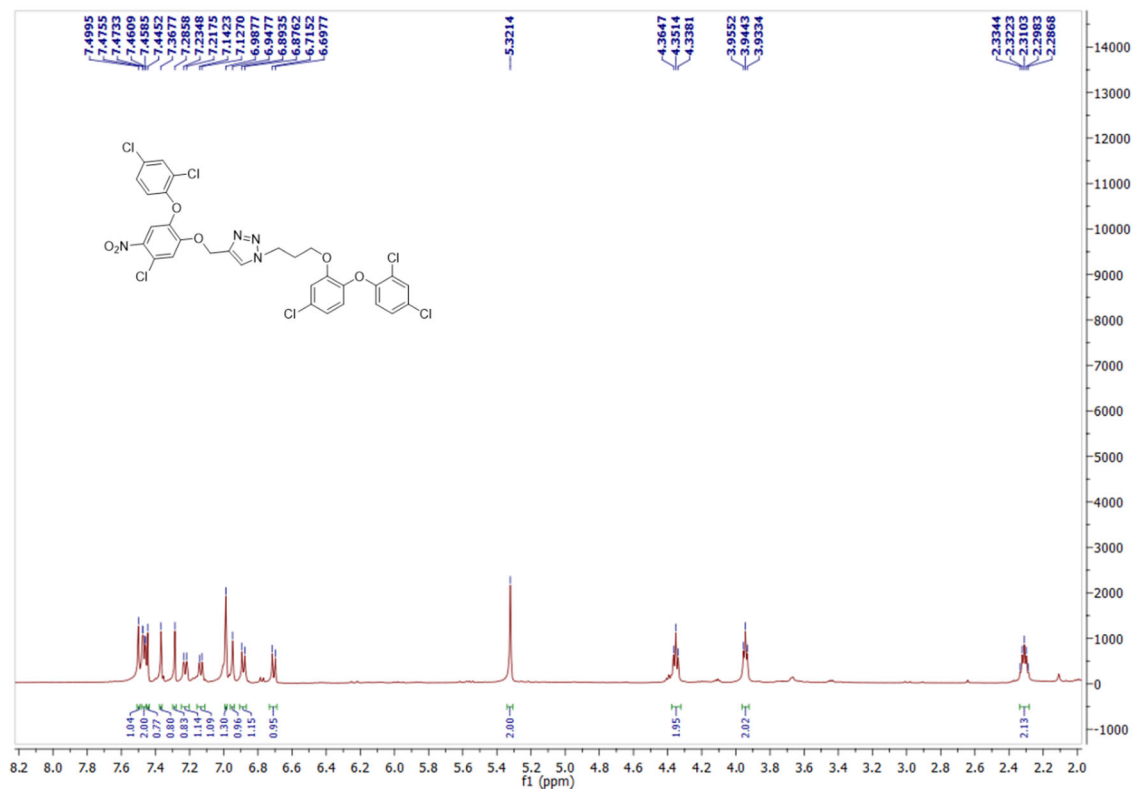

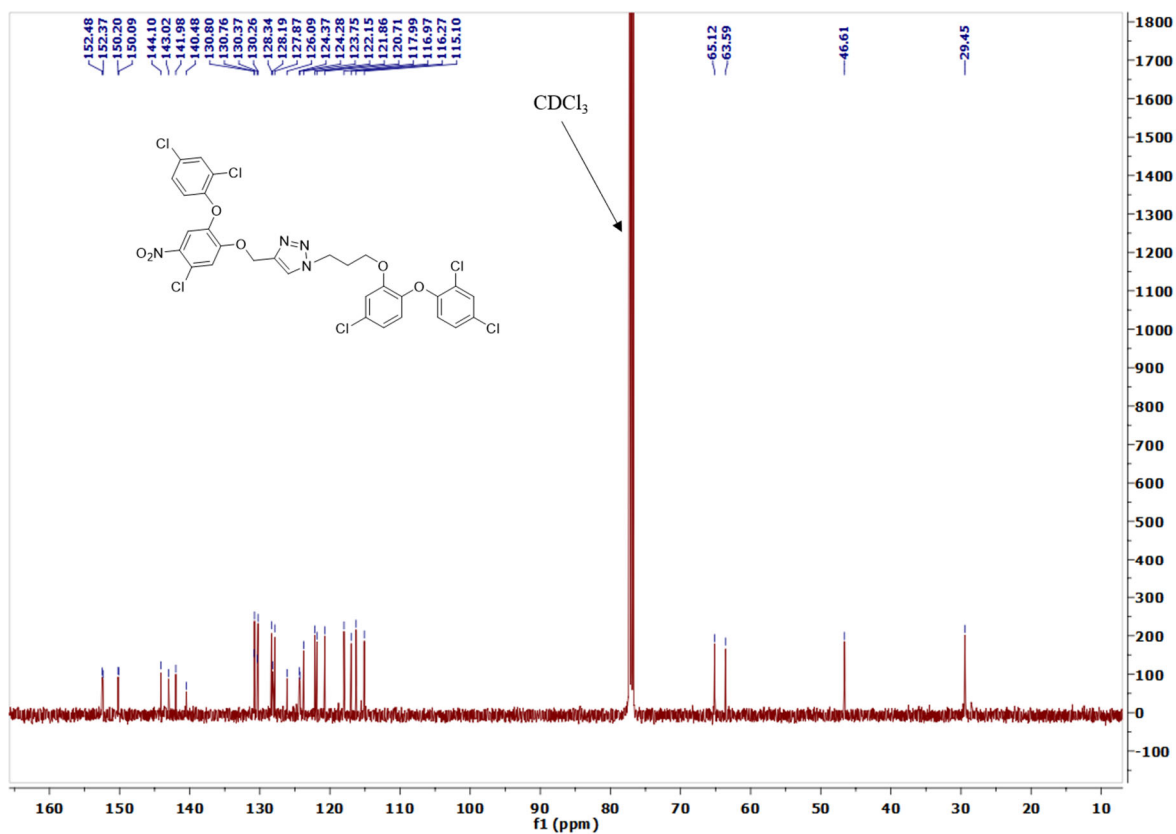

4-((5-chloro-2-(2,4-dichlorophenoxy)-4-nitrophenoxy)methyl)-1-(4-(5-chloro-2-(2,4-dichlorophenoxy)phenoxy)butyl)-1H-1,2,3-triazole (**11c**)

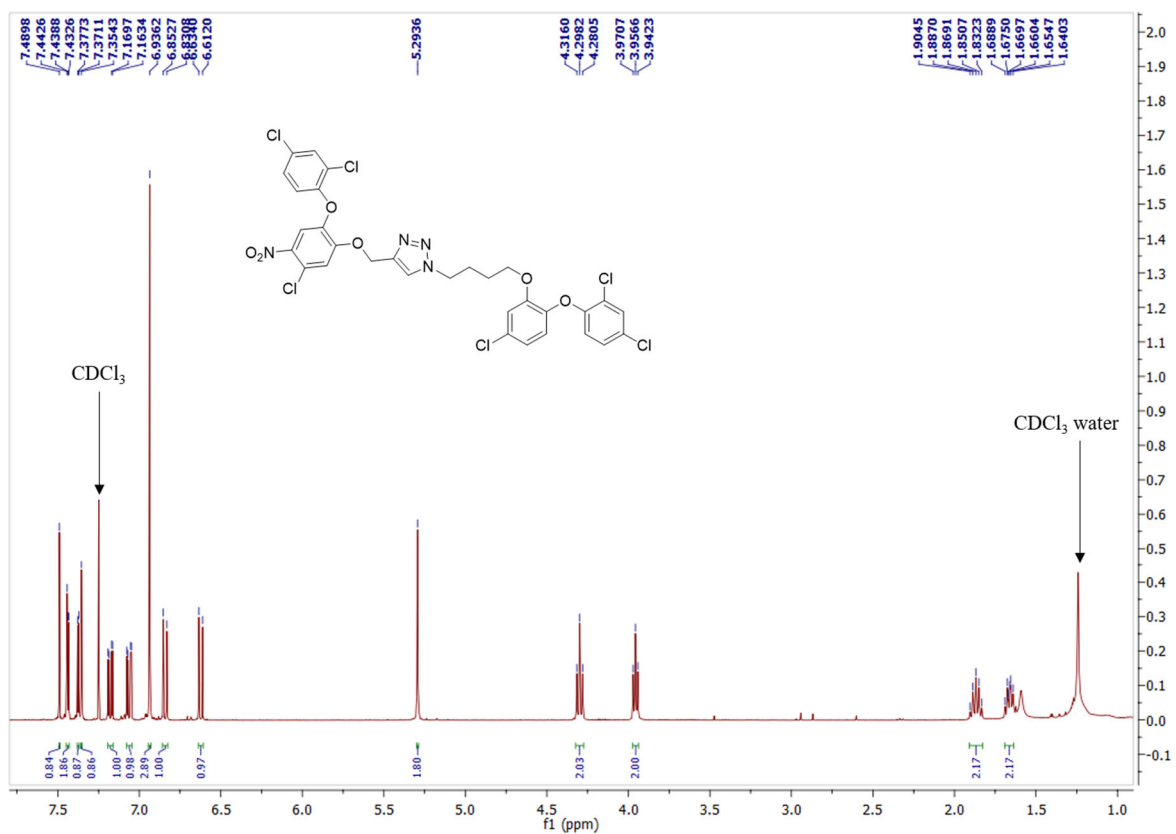



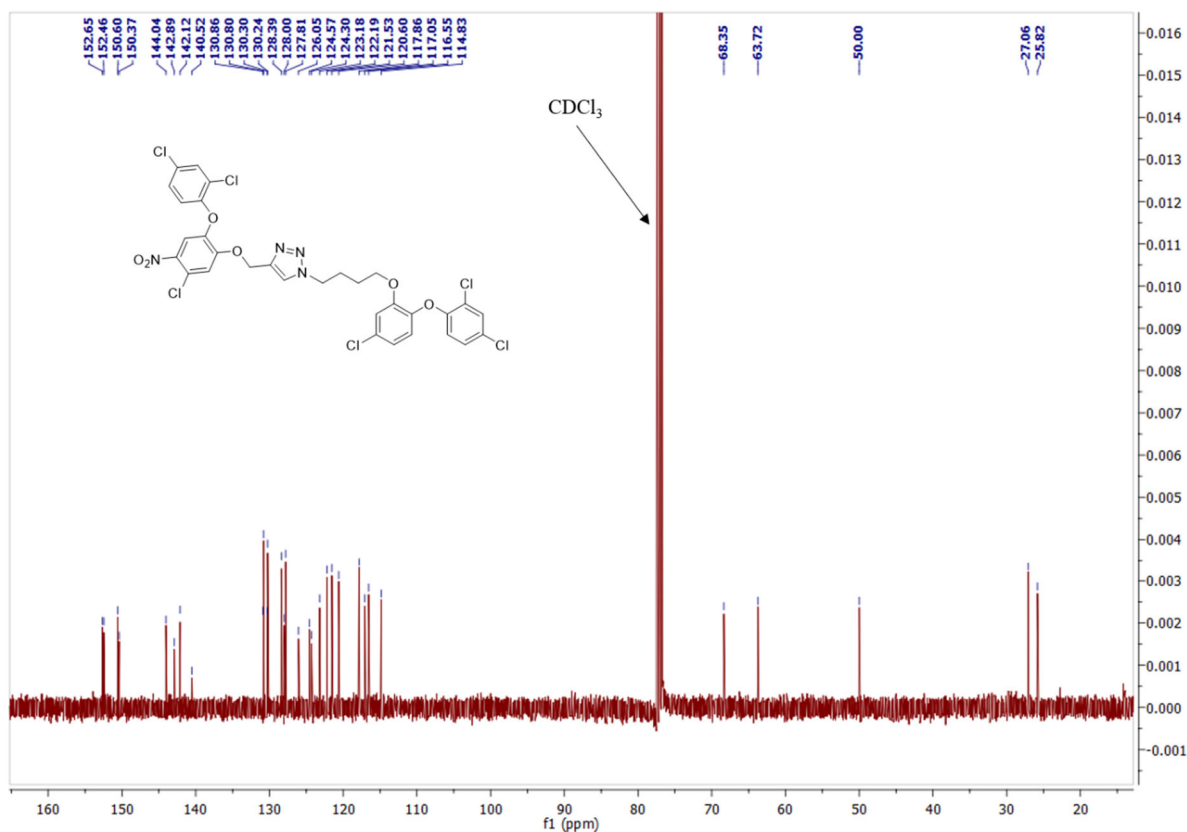

4-((5-chloro-2-(2,4-dichlorophenoxy)-4-nitrophenoxy)methyl)-1-(5-(5-chloro-2-(2,4-dichlorophenoxy)phenoxy)pentyl)-1H-1,2,3-triazole (11d)

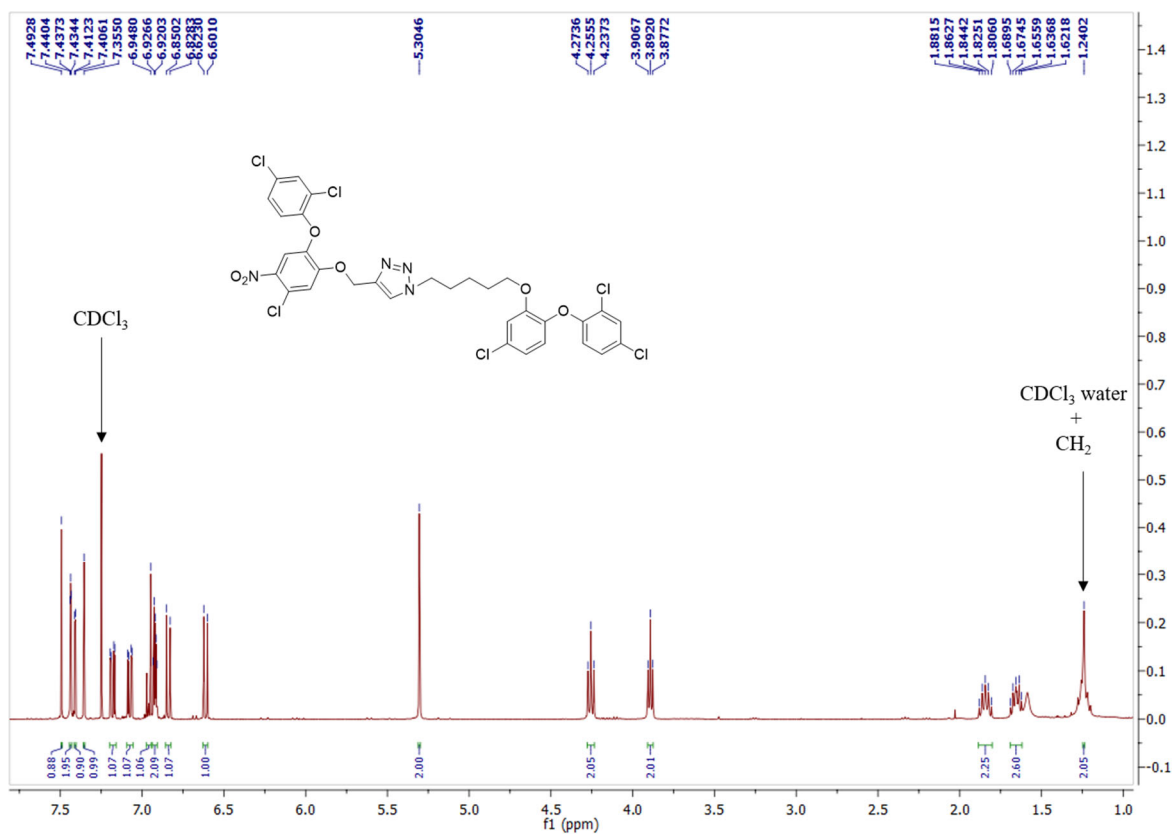

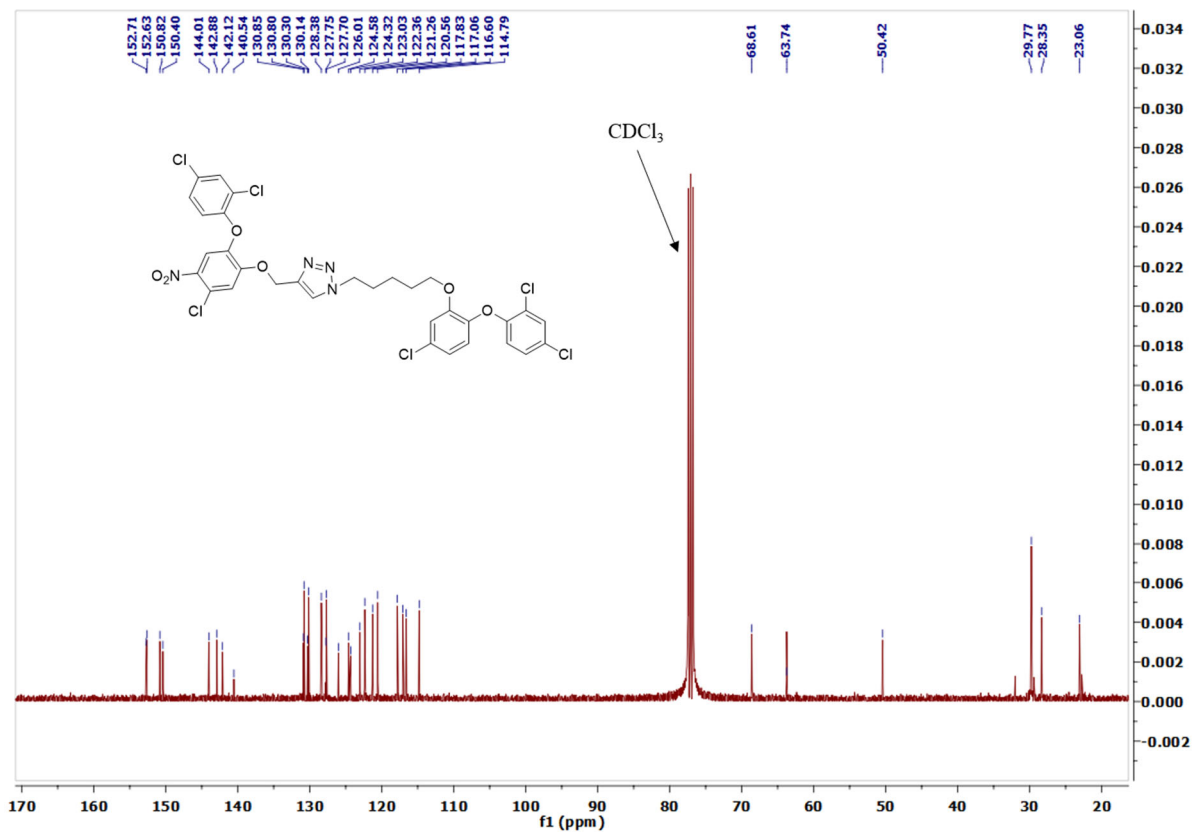

4-((5-chloro-2-(2,4-dichlorophenoxy)-4-nitrophenoxy)methyl)-1-(6-(5-chloro-2-(2,4-dichlorophenoxy)phenoxy)hexyl)-1H-1,2,3-triazole (**11e**)

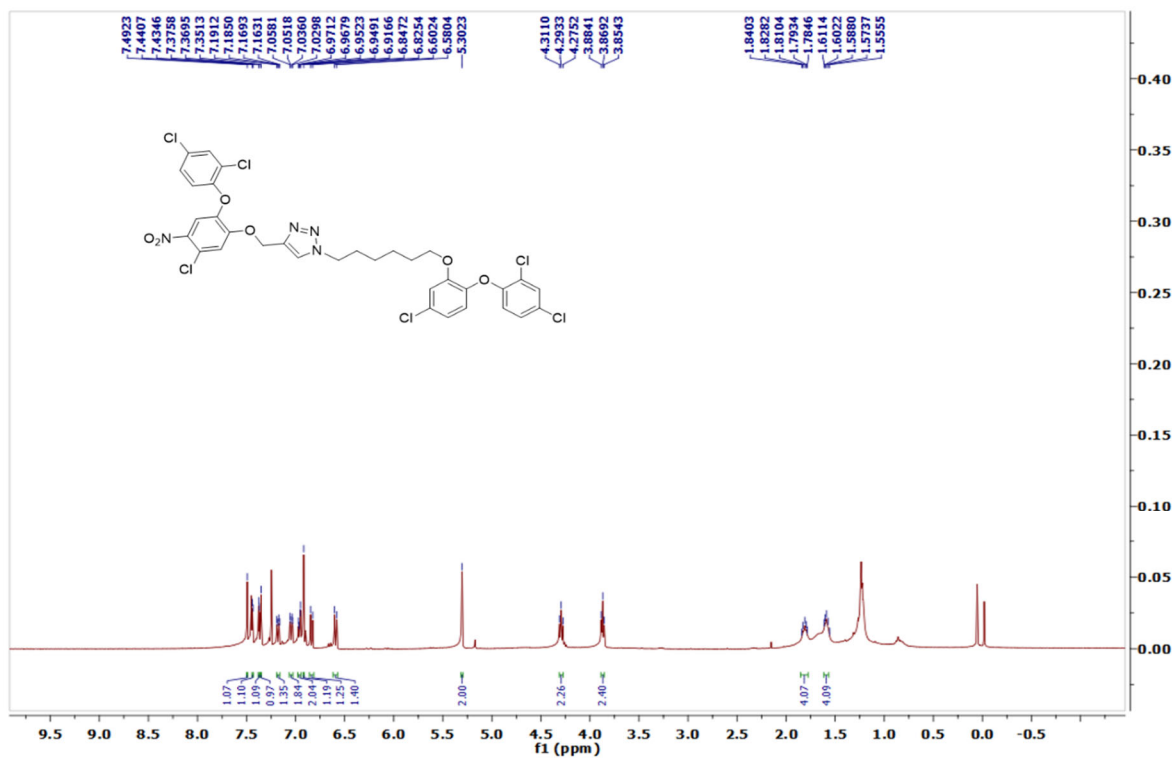

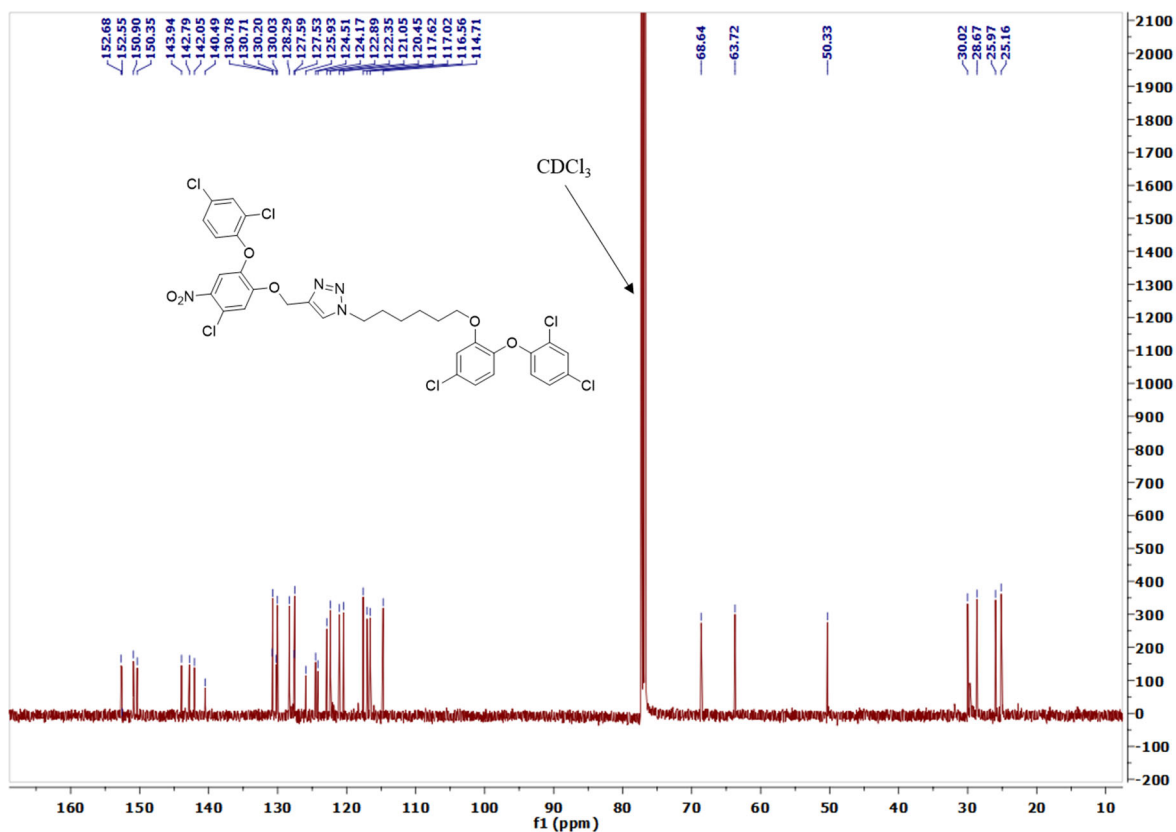

5-chloro-4-(((1-(2-(5-chloro-2-(2,4-dichlorophenoxy)phenoxy)ethyl)-1H-1,2,3-triazol-4-yl)methyl)amino)-2-(2,4-dichlorophenoxy)phenol (**12a**)

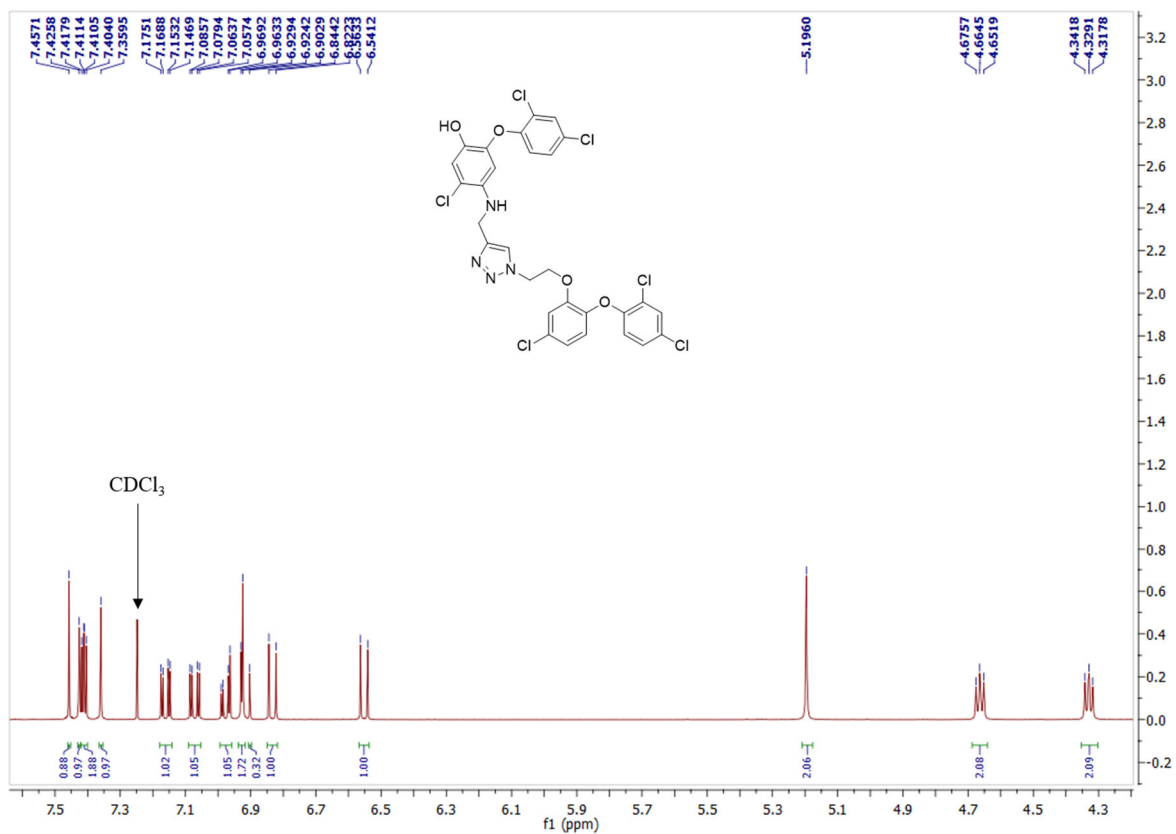

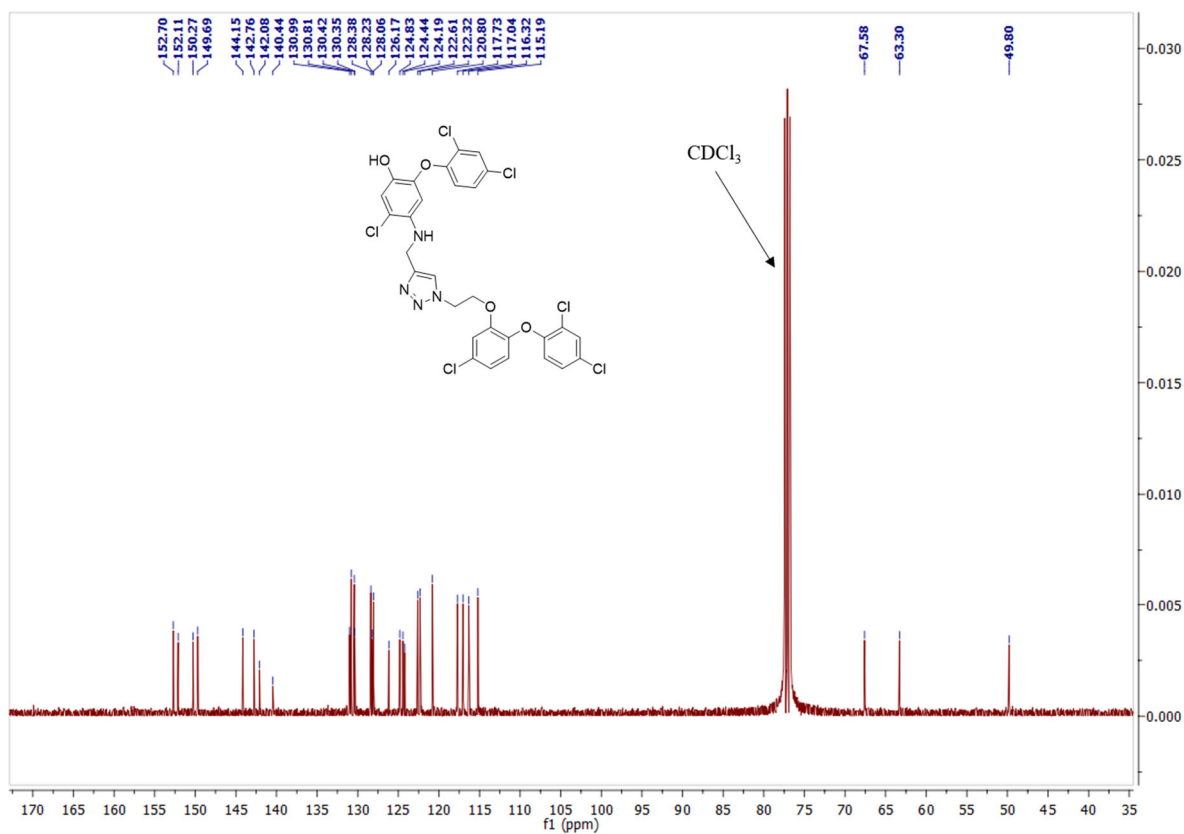

5-chloro-4-(((1-(3-(5-chloro-2-(2,4-dichlorophenoxy)phenoxy)propyl)-1H-1,2,3-triazol-4-yl)methyl)amino)-2-(2,4-dichlorophenoxy)phenol (**12b**)

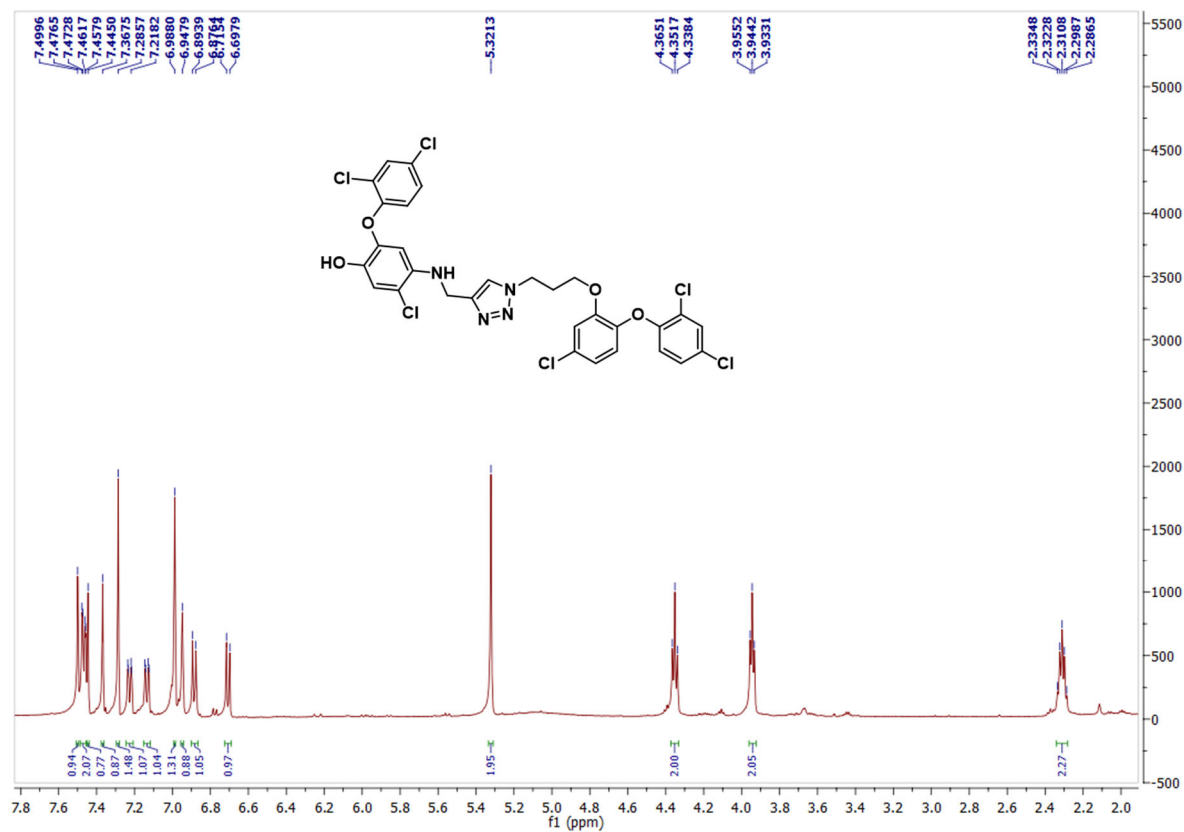

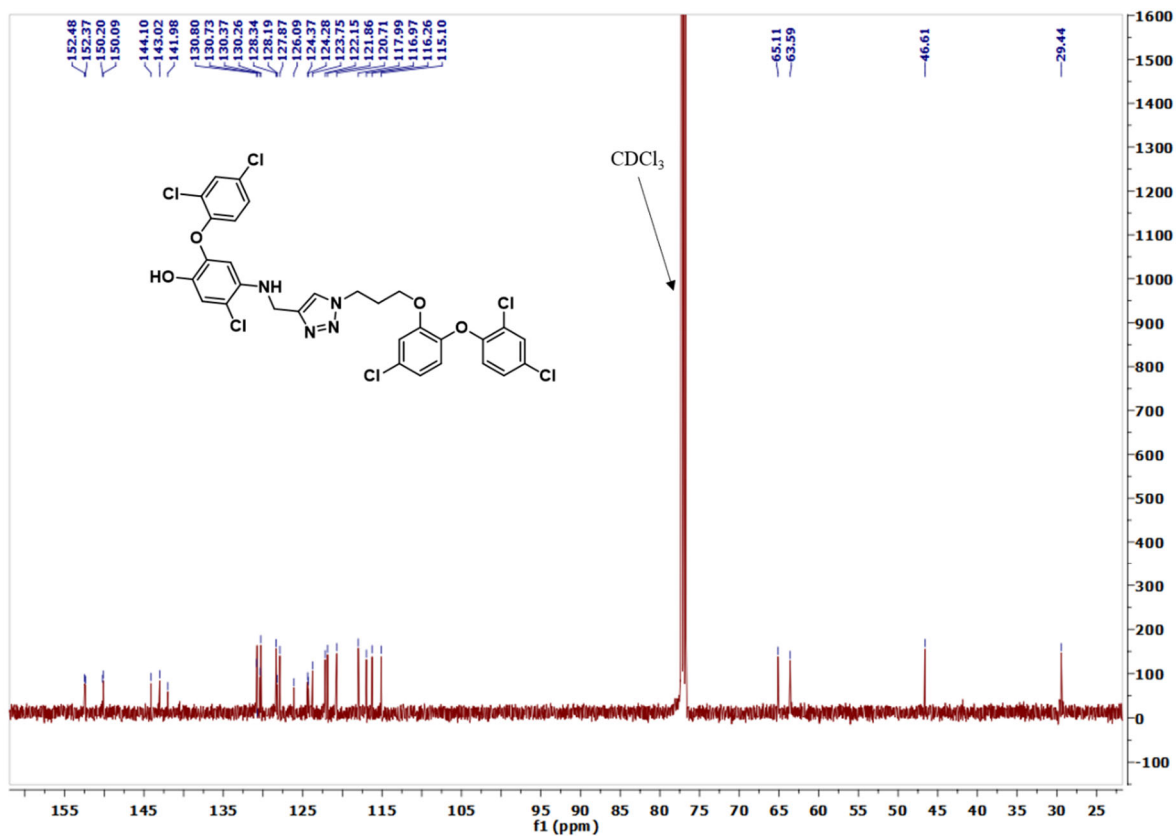

5-chloro-4-(((1-(4-(5-chloro-2-(2,4-dichlorophenoxy)phenoxy)butyl)-1H-1,2,3-triazol-4-yl)methyl)amino)-2-(2,4-dichlorophenoxy)phenol (**12c**)

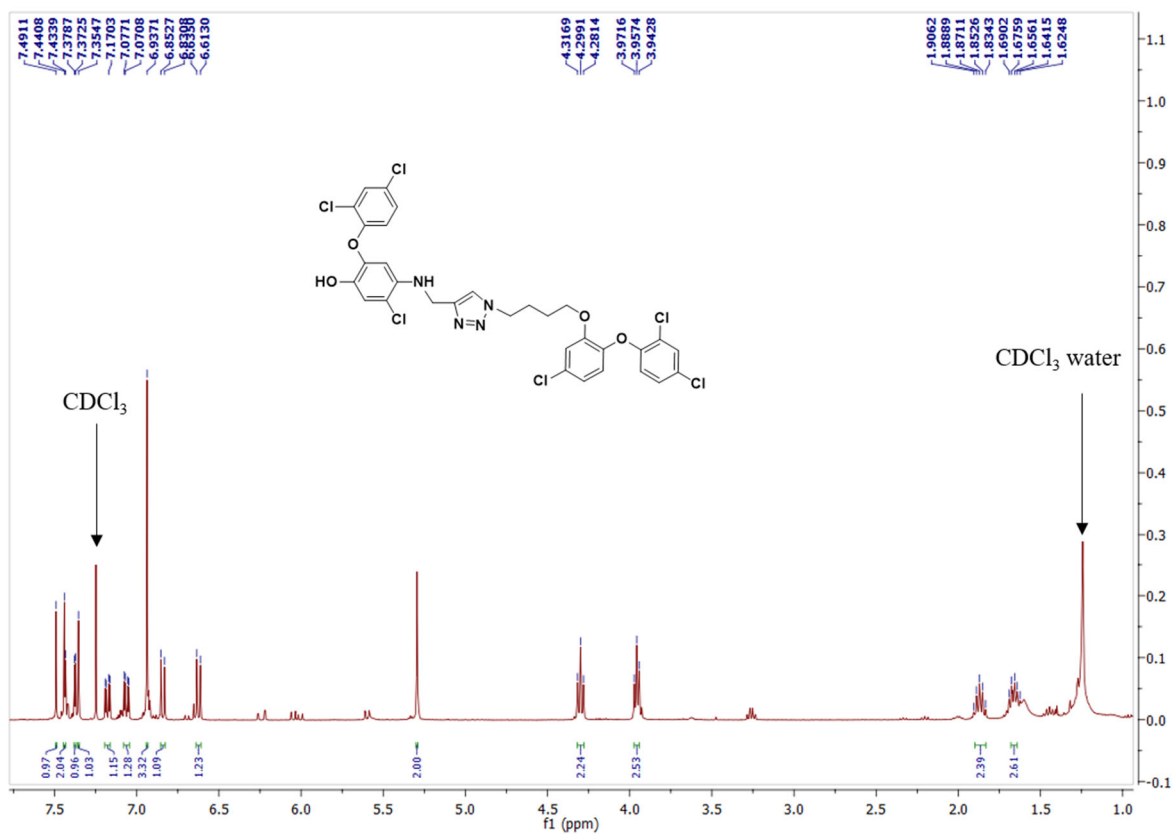

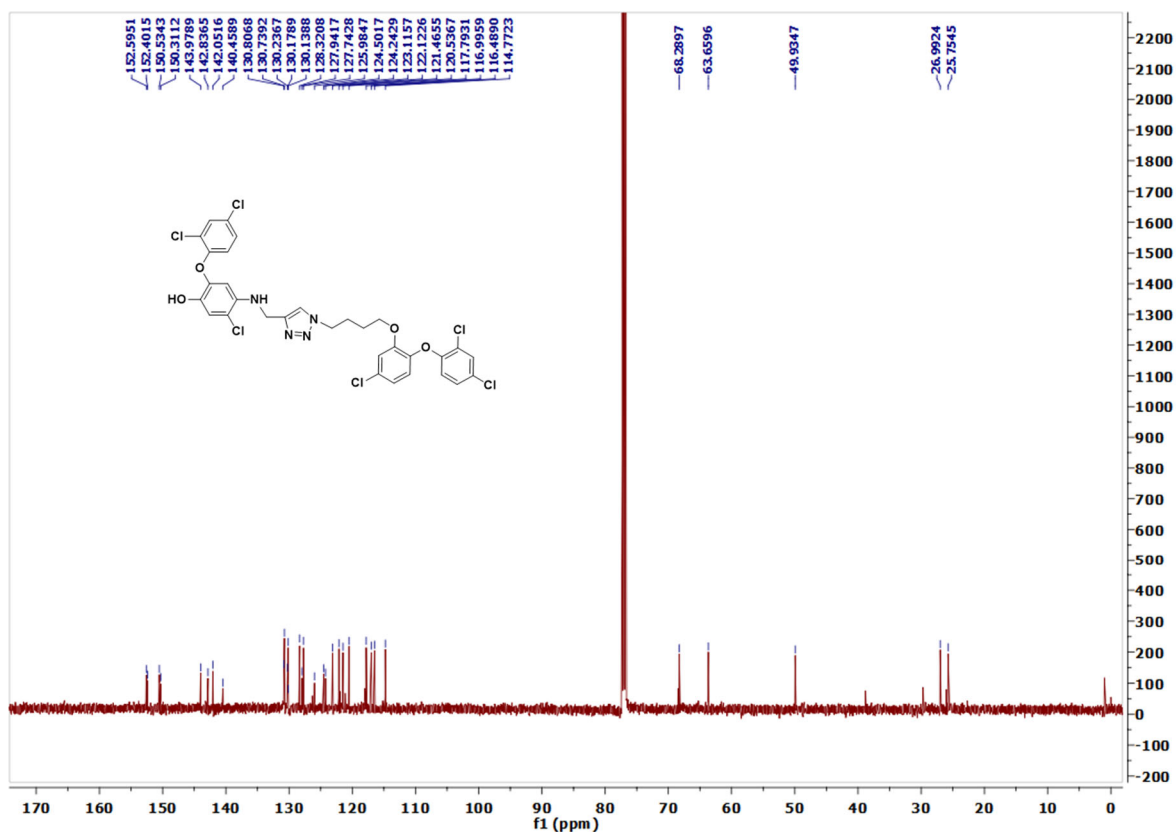

5-chloro-4-(((1-(5-(5-chloro-2-(2,4-dichlorophenoxy)phenoxy)pentyl)-1H-1,2,3-triazol-4-yl)methyl)amino)-2-(2,4-dichlorophenoxy)phenol (**12d**)

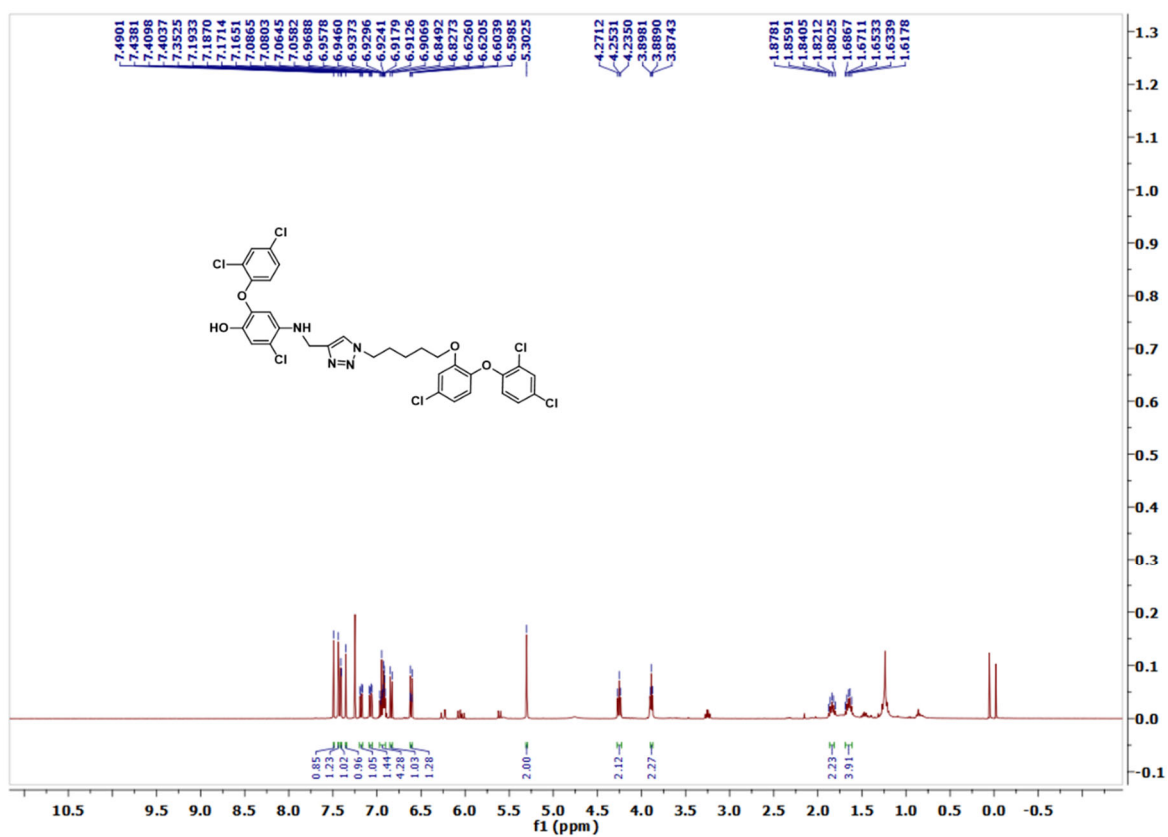

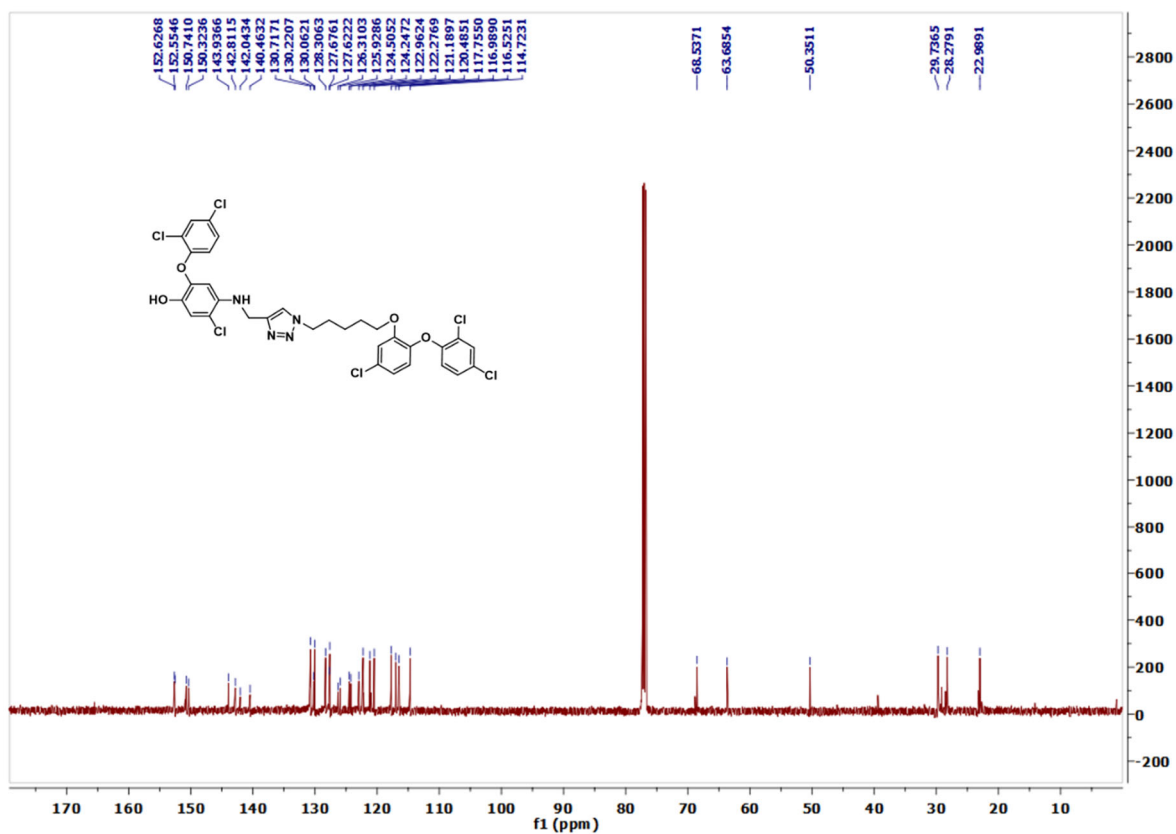

5-chloro-4-(((1-(6-(5-chloro-2-(2,4-dichlorophenoxy)phenoxy)hexyl)-1H-1,2,3-triazol-4-yl)methyl)amino)-2-(2,4-dichlorophenoxy)phenol (12e)

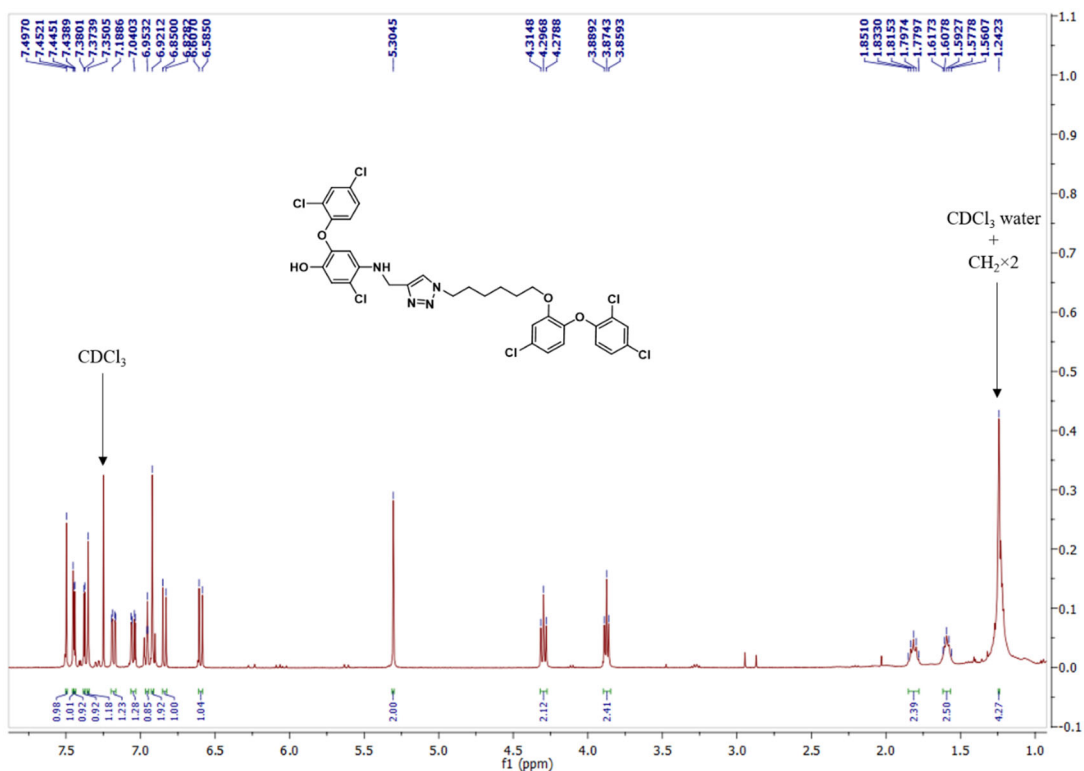

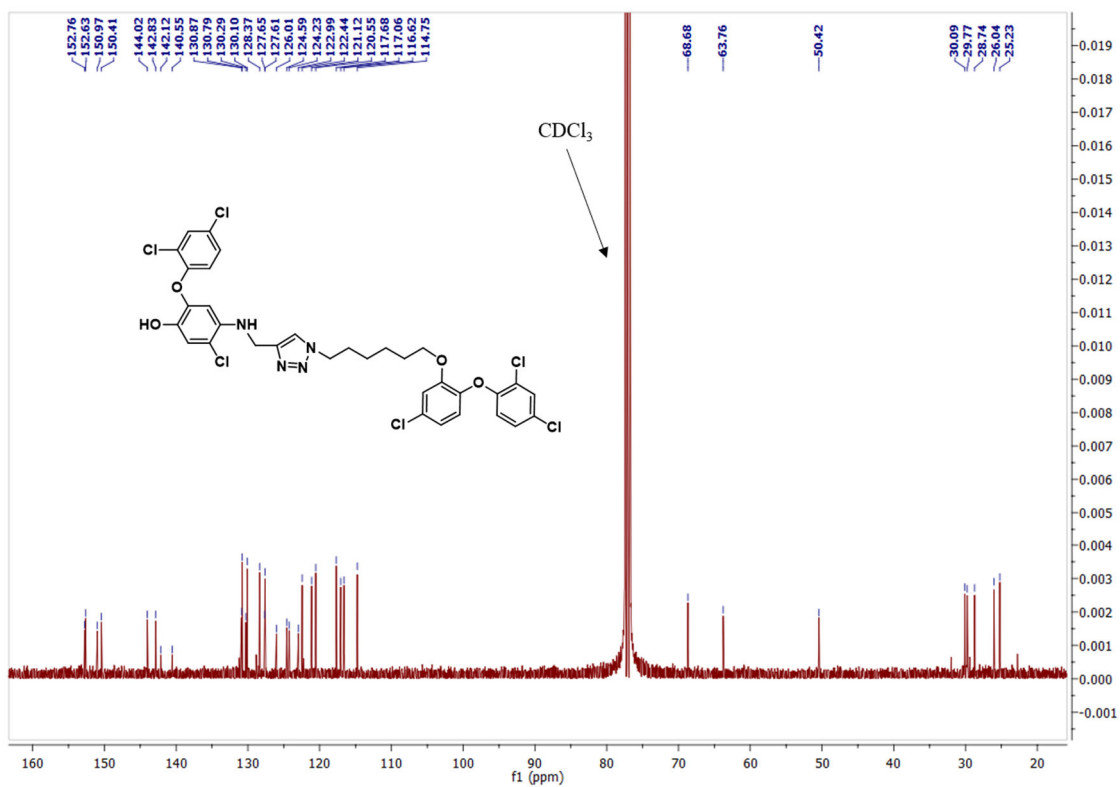

Supplement: d4md00494a1.pdf [file d4md00494a1.pdf]
